# Supplementary material
Source: PubMed Central journal article supplement (PMC8510632)

# THE LANCET

## Digital Health

### Supplementary appendix

This appendix formed part of the original submission and has been peer reviewed. We post it as supplied by the authors.

Supplement to: Ng WY, Tan T-E, Movva PVH, et al. Blockchain applications in health care for COVID-19 and beyond: a systematic review. *Lancet Digit Health* 2021; published online Oct 12. [https://doi.org/10.1016/S2589-7500\(21\)00210-7](https://doi.org/10.1016/S2589-7500(21)00210-7).

## Appendix

| Topic                                                     | Page |
|-----------------------------------------------------------|------|
| Overview of the Blockchain Architecture                   | 2    |
| PRISMA checklist                                          | 5    |
| List of articles reviewed                                 | 8    |
| Summary of COVID-19 and non-COVID-19 related applications | 42   |

## ***Overview of the Blockchain Architecture***

A blockchain is a decentralized digital ledger, where transactions are stored immutably, in blocks of fixed data size, each linked cryptographically to its preceding block, to create an ever-growing chain. Each block is linked to its predecessor by a hash value – a fixed-length string of values computed from the blockchain’s innate hash algorithm, based on the input data. This serves as a permanent identity marker (deterministic) for the set of stored transactions it represents, providing permanent tamper-proof transparency and traceability. This is a critical advantage as it allows the transacted data, which is usually large, to be stored off-chain. Data transfer is secured on blockchain platforms through asymmetric encryption technology (also known as public-key cryptography), that can be designed to keep on-chain data “anonymous”, so as to protect data privacy. During the recording process of the blocks, some blockchain platforms are able to generate native tokens, which can be utilised for transactions, creating a digital asset known as cryptocurrency. We include a summary of common terms and definitions relating to blockchain technology in **Table 1**.

The architecture of a blockchain differs fundamentally from traditional distributed client-server database management systems (DDMSs) used in healthcare, such as EMR and medication supply chain management systems. A blockchain platform achieves secure disintermediation between untrusted parties, by replacing the traditional human intermediary with a hack-proof computational verification algorithm, hence creating a direct peer-to-peer (P2P) model of transactions in a network of computers. This allows direct exchange of data between multiple computers, regardless of their physical location without a single source of failure, using image- and collision-resistant hash algorithms to ensure that these transactions can be easily traced back to their original data provenance.

There are various types of blockchain platforms, but they can broadly be split into 3 categories – public, private, and hybrid/consortium blockchains (**Figure 1**). The key features differentiating these blockchain architectures are the restrictions applied to participating nodes, as well as consensus framework used. Permissionless public blockchain networks such as Bitcoin and Ethereum allow unrestricted participation. Bitcoin was the first blockchain technology introduced to the public in 2009. It was created as a platform to enable peer-to-peer money transfer using its own native token as an alternative to fiat currency. Bitcoin utilises Proof of Work (PoW), which involves a cryptographic puzzle based on a nonce that requires substantial computing power to solve, but for which the answer is easy to verify. The first node that successfully solves the puzzle is eligible to add a new block of transactions to the chain, and receive digital tokens in return – a process known as “mining”. Each block contains a block header, as well as the hash of each individual transaction, linked by a Merkle root hash. The block header contains the hash of the preceding block, a timestamp, its own unique hash, the Merkle root hash, and nonce (**Figure 2**). PoW is extremely energy-consuming and suffers from long latency, yielding a maximum transactional rate of seven transactions per second. This led to the adoption of more cost- and energy-efficient consensus protocols without cryptographic puzzles, such as Ethereum’s Proof of Stake (PoS). With PoS, a node that places a higher stake is more likely to be selected as a validator to determine the next block.

The private permissioned blockchain infrastructures utilize lightweight consensus protocols. Most of the consensus protocols reviewed in this study are either PoS or extensions of the Byzantine Fault Tolerance (BFT). In BFT, a consensus can be achieved so long as more than two thirds of the nodes are honest ( $N = 3f + 1$  where  $N$  is total number of nodes and  $f$  is the number of malicious nodes). Notable BFT examples found in this study

include Quorum and Hyperledger Fabric. These consensus protocols promise greater scalability and functionality due to their higher efficiency and lower latency.

Hybrid blockchains, on the other hand, possess selected attributes of both public and private blockchains. These custom-built blockchain platforms are governed by multiple organizations, with high requirements for latency minimization and moderate requirements for horizontal scalability.

Following the introduction of Ethereum, smart contracts were developed and incorporated into the platform in 2013. This utilised programming codes that automatically execute and enforce contractual agreements between untrusted parties when pre-determined requirements are met, without the need for an intermediary. Continuous improvements to the smart contract designs have since spawned new variations such as Hashed Time-Lock Contracts, application logic contracts, and decentralized autonomous organizations. These have helped to imbue dynamic functionality into the blockchain architecture, allowing for execution of transactions beyond just monetary exchange. As a result, any digital matter of perceived value (e.g. personal data, certificate or digital art) can be represented and transacted on the blockchain, as exemplified by the emergence of non-fungible tokens.

**Table 1.** List of definitions for terminologies that are frequently encountered in blockchain-related articles

|                            |                                                                                                                                                                                                                    |
|----------------------------|--------------------------------------------------------------------------------------------------------------------------------------------------------------------------------------------------------------------|
| Ledger                     | Book or computer file for recording and totalling transactions                                                                                                                                                     |
| Blocks                     | Transactions cumulated and recorded into fixed sized blocks. Each block contains timestamp, a unique hash, the hash of the previous block and transaction data                                                     |
| Chain                      | List of blocks linked cryptographically                                                                                                                                                                            |
| Hash                       | Cryptographically generated fixed length string of values, based on random input of transactions/data, that is easily verifiable                                                                                   |
| Mining                     | Validating of transactions and recording onto the decentralized ledger                                                                                                                                             |
| Byzantine generals problem | Computer science description of a situation where involved parties must reach a decision to avoid failure, but some parties are dishonest or malicious                                                             |
| Consensus protocol         | A form of rules to reach a common majority agreement on the present state of the ledger within a blockchain network                                                                                                |
| Fault tolerance            | Level that allows a system to continue operating normally in the event of failure of some components or nodes                                                                                                      |
| Nodes                      | Communicating points that may perform different functions on the blockchain platform                                                                                                                               |
| Permissioned               | Access control layer governed by a central authority                                                                                                                                                               |
| Permissionless             | Public access without restriction to participation                                                                                                                                                                 |
| Hybrid/Consortium          | Blockchain platform governed by multiple organizations                                                                                                                                                             |
| Immutable                  | Unchangeable ledger                                                                                                                                                                                                |
| Cryptoasset                | Digital assets that utilizes cryptography as a medium for transactions                                                                                                                                             |
| Smart contracts            | Automated executions of complex transactions based on computational logic when certain conditions are met                                                                                                          |
| Asymptotic security        | Security if and only if the adversary's advantage is a negligible function of the security parameters i.e. a secure scheme that is conditionally proven to be harder than any polynomial for the attacker to break |
| Deterministic              | Same operation performed by different nodes will produce the same result                                                                                                                                           |
| Pre-image resistance       | Computationally infeasible to derive the original transaction data from a given hash function                                                                                                                      |
| Collision resistance       | Computationally infeasible for two distinct inputs to result in the same hash output                                                                                                                               |
| Non-repudiation            | A statement's author cannot successfully dispute its authorship or the validity of an associated contract                                                                                                          |
| Disintermediation          | Removal of intermediaries from a decision-making process                                                                                                                                                           |

This is a schematic illustration of 3 broad categories of blockchain platforms. Public blockchains are permission-less and fully decentralized, without central control. Anonymous parties can join a public blockchain to add and validate transactions without restrictions. Private blockchains, in contrast, are permissioned platforms where only participants with known identify can participate. These networks are partially decentralized, and often use simpler, more lightweight consensus protocols. Hybrid blockchains are platforms with selected attributes of both public and private blockchains, often custom-built to be optimized for specific use-cases.

**Figure 1. Illustration of a blockchain.** This schematic shows the technical structure of data in a blockchain. In this illustration, blocks N1 to N5 form a chain, where the block header of each block contains the hash of the preceding block (Hash\_pre). Each block also contains a nonce, a timestamp, a Merkle root hash (Rcd\_Root), and its own unique hash value (Hash\_cur). A Merkle tree, which is a tree of hash values that allow for efficient verification of data, is also illustrated.

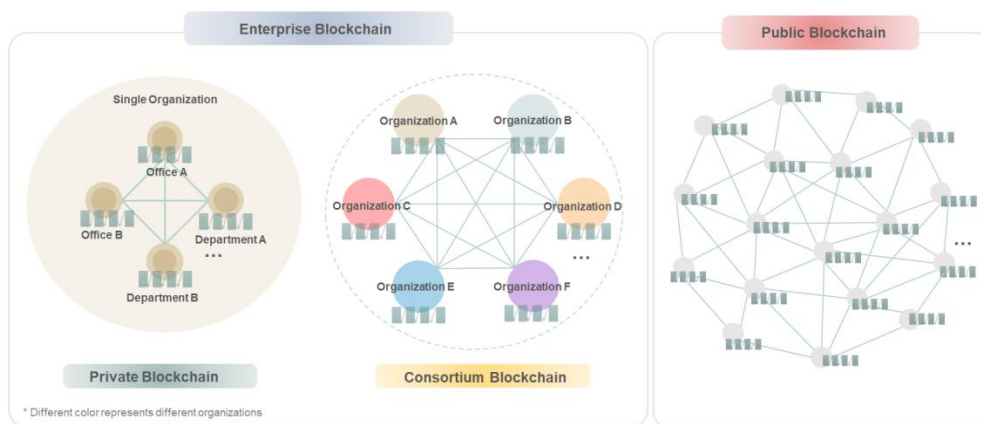

**Figure 2. Illustration of the fundamental structure of a blockchain.**

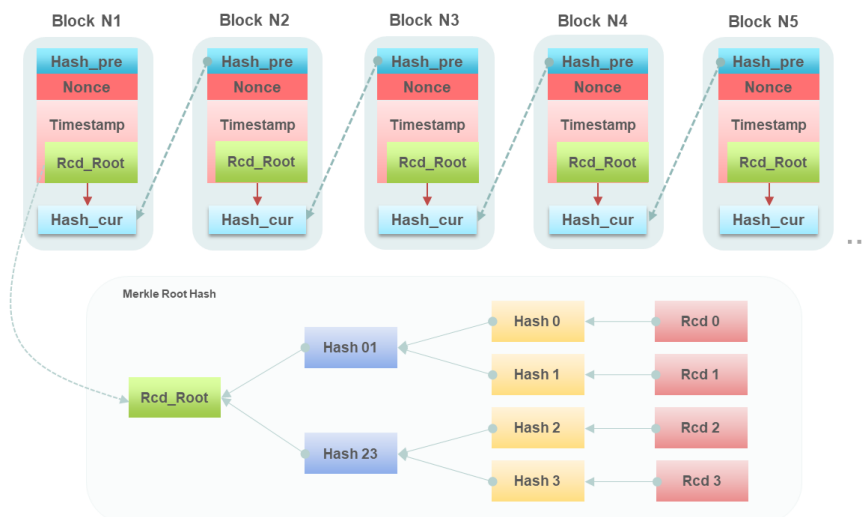

\* “Rcd” refers to data records e.g. transaction

**Table 2. Preferred Reporting Items for Systematic reviews and Meta-Analyses (PRISMA) Checklist**

| Section and Topic             | Item # | Checklist item                                                                                                                                                                                                                                                                                       | Location where item is reported |
|-------------------------------|--------|------------------------------------------------------------------------------------------------------------------------------------------------------------------------------------------------------------------------------------------------------------------------------------------------------|---------------------------------|
| <b>TITLE</b>                  |        |                                                                                                                                                                                                                                                                                                      |                                 |
| Title                         | 1      | Identify the report as a systematic review.                                                                                                                                                                                                                                                          | 1                               |
| <b>ABSTRACT</b>               |        |                                                                                                                                                                                                                                                                                                      |                                 |
| Abstract                      | 2      | See the PRISMA 2020 for Abstracts checklist.                                                                                                                                                                                                                                                         | 3                               |
| <b>INTRODUCTION</b>           |        |                                                                                                                                                                                                                                                                                                      |                                 |
| Rationale                     | 3      | Describe the rationale for the review in the context of existing knowledge.                                                                                                                                                                                                                          | 4-5                             |
| Objectives                    | 4      | Provide an explicit statement of the objective(s) or question(s) the review addresses.                                                                                                                                                                                                               | 5                               |
| <b>METHODS</b>                |        |                                                                                                                                                                                                                                                                                                      |                                 |
| Eligibility criteria          | 5      | Specify the inclusion and exclusion criteria for the review and how studies were grouped for the syntheses.                                                                                                                                                                                          | 5-6                             |
| Information sources           | 6      | Specify all databases, registers, websites, organisations, reference lists and other sources searched or consulted to identify studies. Specify the date when each source was last searched or consulted.                                                                                            | 6                               |
| Search strategy               | 7      | Present the full search strategies for all databases, registers and websites, including any filters and limits used.                                                                                                                                                                                 | 6                               |
| Selection process             | 8      | Specify the methods used to decide whether a study met the inclusion criteria of the review, including how many reviewers screened each record and each report retrieved, whether they worked independently, and if applicable, details of automation tools used in the process.                     | 6-7                             |
| Data collection process       | 9      | Specify the methods used to collect data from reports, including how many reviewers collected data from each report, whether they worked independently, any processes for obtaining or confirming data from study investigators, and if applicable, details of automation tools used in the process. | 7                               |
| Data items                    | 10a    | List and define all outcomes for which data were sought. Specify whether all results that were compatible with each outcome domain in each study were sought (e.g. for all measures, time points, analyses), and if not, the methods used to decide which results to collect.                        | 7                               |
|                               | 10b    | List and define all other variables for which data were sought (e.g. participant and intervention characteristics, funding sources). Describe any assumptions made about any missing or unclear information.                                                                                         | 7, Table 1                      |
| Study risk of bias assessment | 11     | Specify the methods used to assess risk of bias in the included studies, including details of the tool(s) used, how many reviewers assessed each study and whether they worked independently, and if applicable, details of automation tools used in the process.                                    | Not applicable                  |
| Effect measures               | 12     | Specify for each outcome the effect measure(s) (e.g. risk ratio, mean difference) used in the synthesis or presentation of results.                                                                                                                                                                  | Not applicable                  |
| Synthesis methods             | 13a    | Describe the processes used to decide which studies were eligible for each synthesis (e.g. tabulating the study intervention characteristics and comparing against the planned groups for each synthesis (item #5)).                                                                                 | 6-7                             |

| Section and Topic             | Item # | Checklist item                                                                                                                                                                                                                                                                       | Location where item is reported |
|-------------------------------|--------|--------------------------------------------------------------------------------------------------------------------------------------------------------------------------------------------------------------------------------------------------------------------------------------|---------------------------------|
|                               | 13b    | Describe any methods required to prepare the data for presentation or synthesis, such as handling of missing summary statistics, or data conversions.                                                                                                                                | 7                               |
|                               | 13c    | Describe any methods used to tabulate or visually display results of individual studies and syntheses.                                                                                                                                                                               | 5-7                             |
|                               | 13d    | Describe any methods used to synthesize results and provide a rationale for the choice(s). If meta-analysis was performed, describe the model(s), method(s) to identify the presence and extent of statistical heterogeneity, and software package(s) used.                          | 5-7                             |
|                               | 13e    | Describe any methods used to explore possible causes of heterogeneity among study results (e.g. subgroup analysis, meta-regression).                                                                                                                                                 | Not applicable                  |
|                               | 13f    | Describe any sensitivity analyses conducted to assess robustness of the synthesized results.                                                                                                                                                                                         | Not applicable                  |
| Reporting bias assessment     | 14     | Describe any methods used to assess risk of bias due to missing results in a synthesis (arising from reporting biases).                                                                                                                                                              | Not applicable                  |
| Certainty assessment          | 15     | Describe any methods used to assess certainty (or confidence) in the body of evidence for an outcome.                                                                                                                                                                                | Not applicable                  |
| <b>RESULTS</b>                |        |                                                                                                                                                                                                                                                                                      |                                 |
| Study selection               | 16a    | Describe the results of the search and selection process, from the number of records identified in the search to the number of studies included in the review, ideally using a flow diagram.                                                                                         | Figure 2                        |
|                               | 16b    | Cite studies that might appear to meet the inclusion criteria, but which were excluded, and explain why they were excluded.                                                                                                                                                          | Figure 2                        |
| Study characteristics         | 17     | Cite each included study and present its characteristics.                                                                                                                                                                                                                            | Appendix Page 9                 |
| Risk of bias in studies       | 18     | Present assessments of risk of bias for each included study.                                                                                                                                                                                                                         | Not applicable                  |
| Results of individual studies | 19     | For all outcomes, present, for each study: (a) summary statistics for each group (where appropriate) and (b) an effect estimate and its precision (e.g. confidence/credible interval), ideally using structured tables or plots.                                                     | Not applicable                  |
| Results of syntheses          | 20a    | For each synthesis, briefly summarise the characteristics and risk of bias among contributing studies.                                                                                                                                                                               | 8                               |
|                               | 20b    | Present results of all statistical syntheses conducted. If meta-analysis was done, present for each the summary estimate and its precision (e.g. confidence/credible interval) and measures of statistical heterogeneity. If comparing groups, describe the direction of the effect. | Table 2<br>Figure 3 & 4         |
|                               | 20c    | Present results of all investigations of possible causes of heterogeneity among study results.                                                                                                                                                                                       | Appendix Page 8                 |

| Section and Topic                              | Item # | Checklist item                                                                                                                                                                                                                             | Location where item is reported |
|------------------------------------------------|--------|--------------------------------------------------------------------------------------------------------------------------------------------------------------------------------------------------------------------------------------------|---------------------------------|
|                                                | 20d    | Present results of all sensitivity analyses conducted to assess the robustness of the synthesized results.                                                                                                                                 | Not applicable                  |
| Reporting biases                               | 21     | Present assessments of risk of bias due to missing results (arising from reporting biases) for each synthesis assessed.                                                                                                                    | Not applicable                  |
| Certainty of evidence                          | 22     | Present assessments of certainty (or confidence) in the body of evidence for each outcome assessed.                                                                                                                                        | Not applicable                  |
| <b>DISCUSSION</b>                              |        |                                                                                                                                                                                                                                            |                                 |
| Discussion                                     | 23a    | Provide a general interpretation of the results in the context of other evidence.                                                                                                                                                          | 10-15                           |
|                                                | 23b    | Discuss any limitations of the evidence included in the review.                                                                                                                                                                            | 16-17                           |
|                                                | 23c    | Discuss any limitations of the review processes used.                                                                                                                                                                                      | 16-17                           |
|                                                | 23d    | Discuss implications of the results for practice, policy, and future research.                                                                                                                                                             | 15-16                           |
| <b>OTHER INFORMATION</b>                       |        |                                                                                                                                                                                                                                            |                                 |
| Registration and protocol                      | 24a    | Provide registration information for the review, including register name and registration number, or state that the review was not registered.                                                                                             | 5                               |
|                                                | 24b    | Indicate where the review protocol can be accessed, or state that a protocol was not prepared.                                                                                                                                             | 5                               |
|                                                | 24c    | Describe and explain any amendments to information provided at registration or in the protocol.                                                                                                                                            | Not applicable                  |
| Support                                        | 25     | Describe sources of financial or non-financial support for the review, and the role of the funders or sponsors in the review.                                                                                                              | 8                               |
| Competing interests                            | 26     | Declare any competing interests of review authors.                                                                                                                                                                                         | 17                              |
| Availability of data, code and other materials | 27     | Report which of the following are publicly available and where they can be found: template data collection forms; data extracted from included studies; data used for all analyses; analytic code; any other materials used in the review. | 17                              |

From: Page MJ, McKenzie JE, Bossuyt PM, Boutron I, Hoffmann TC, Mulrow CD, et al. The PRISMA 2020 statement: an updated guideline for reporting systematic reviews. *BMJ* 2021;372:n71. doi: 10.1136/bmj.n71

For more information, visit: <http://www.prisma-statement.org/>



| Article                                                    | Journal     | Author<br>Year              | Title<br><i>Platform name</i>                                                                                                                                    | Results   |
|------------------------------------------------------------|-------------|-----------------------------|------------------------------------------------------------------------------------------------------------------------------------------------------------------|-----------|
| <b>COVID related</b>                                       |             |                             |                                                                                                                                                                  |           |
| <i>Artificial intelligence/Big data/Federated learning</i> |             |                             |                                                                                                                                                                  |           |
| C1                                                         | ArXiv       | Kumar R. et al<br>2020      | Blockchain-Federated-Learning and Deep Learning Models for COVID-19 Detection Using CT Imaging<br><i>Not specified</i>                                           | Simulated |
| C2                                                         | ArXiv       | Kumar R. et al<br>2021      | Blockchain based Privacy-Preserved Federated Learning for Medical Images: A Case Study of COVID-19 CT Scans<br><i>DAG</i>                                        | Simulated |
| C3                                                         | Pubmed      | Peyvandi A. et al<br>2021   | Computer-Aided-Diagnosis as a Service on Decentralized Medical Cloud for Efficient and Rapid Emergency Response Intelligence<br><i>Ethereum</i>                  | Simulated |
| <i>Clinical trials/Research</i>                            |             |                             |                                                                                                                                                                  |           |
| C4                                                         | IEEE Xplore | Yu K. et al<br>2020         | Efficient and Privacy-Preserving Medical Research Support Platform Against COVID-19: A Blockchain-Based Approach<br><i>Hyperledger</i>                           | Simulated |
| <i>Contact tracing</i>                                     |             |                             |                                                                                                                                                                  |           |
| C5                                                         | Pubmed      | Aslam B. et al<br>2021      | Blockchain and ANFIS empowered IoMT application for privacy preserved contact tracing in COVID-19 pandemic<br><i>Not specified</i>                               | Simulated |
| C6                                                         | ArXiv       | Song J. et al<br>2020       | Blockchain Meets COVID-19: A Framework for Contact Information Sharing and Risk Notification System<br><i>Ethereum</i>                                           | Simulated |
| C7                                                         | ArXiv       | Xu H. et al<br>2020         | BeepTrace: Blockchain-enabled Privacy-preserving Contact Tracing for COVID-19 Pandemic and Beyond<br><i>Not specified</i>                                        | Simulated |
| C8                                                         | Pubmed      | Vangipuram S. et al<br>2021 | CoviChain: A Blockchain Based Framework for Nonrepudiable Contact Tracing in Healthcare Cyber-Physical Systems During Pandemic Outbreaks<br><i>Not specified</i> | Simulated |
| C9                                                         | ArXiv       | Lv W. et al<br>2020         | Decentralized Blockchain for Privacy-Preserving Large-Scale Contact Tracing<br><i>Not specified</i>                                                              | Simulated |
| C10                                                        | ArXiv       | Ahmed M. et al<br>2021      | DIMY: Enabling Privacy-preserving Contact Tracing<br><i>Hyperledger</i>                                                                                          | Simulated |
| <b>C11</b>                                                 | IEEE Xplore | Klaine PV. et al<br>2020    | Privacy-Preserving Contact Tracing and Public Risk Assessment Using Blockchain for COVID-19 Pandemic                                                             | Simulated |

|                                                    |               |                                |                                                                                                                                                               |           |
|----------------------------------------------------|---------------|--------------------------------|---------------------------------------------------------------------------------------------------------------------------------------------------------------|-----------|
|                                                    |               |                                | <i>Not specified</i>                                                                                                                                          |           |
| C12                                                | ScienceDirect | Zhang C. et al<br>2021         | Privacy-Preserving Contact Tracing in 5G-Integrated and Blockchain-Based Medical Applications<br><i>Hyperledger</i>                                           | Simulated |
| <i>Electronic medical records</i>                  |               |                                |                                                                                                                                                               |           |
| C13                                                | IEEE Xplore   | Ghani A. et al<br>2021         | A Blockchain-based secure PHR data storage and sharing framework<br><i>Ethereum</i>                                                                           | Simulated |
| C14                                                | IEEE Xplore   | Randhir K. et al<br>2020       | A Secure and Distributed Framework for sharing COVID-19 patient Reports using Consortium Blockchain and IPFS<br><i>Ethereum</i>                               | Simulated |
| C15                                                | IEEE Xplore   | Christodoulou K. et al<br>2020 | Health Information Exchange with Blockchain amid Covid-19-like Pandemics<br><i>Ethereum</i>                                                                   | Nil       |
| C16                                                | Pubmed        | Kumar M. et al<br>2021         | MedHypChain: A patient-centered interoperability hyperledger-based medical healthcare system: Regulation in COVID-19 pandemic<br><i>Hyperledger</i>           | Simulated |
| <i>Health/Vaccine Passport/Certificate related</i> |               |                                |                                                                                                                                                               |           |
| C17                                                | ArXiv         | Shamsi K. et al<br>2020        | A Secure and Efficient Approach for Issuing KYC Token As COVID-19 Health Certificate Based on Stellar Blockchain Network<br><i>Stellar Consensus Protocol</i> | Nil       |
| C18                                                | IEEE Xplore   | Hasan HR. et al<br>2020        | Blockchain-Based Solution for COVID-19 Digital Medical Passports and Immunity Certificates<br><i>Ethereum</i>                                                 | Simulated |
| C19                                                | ArXiv         | Rotbi MF. et al<br>2021        | Blockchain technology for a Safe and Transparent Covid-19 Vaccination<br><i>Ethereum</i>                                                                      | Nil       |
| C20                                                | ArXiv         | Eisenstadt M. et al<br>2020    | COVID-19 Antibody Test / Vaccination Certification: There's an App for That<br><i>Ethereum</i>                                                                | Simulated |
| C21                                                | ArXiv         | Angelopoulos CM. et al<br>2020 | DHP Framework: Digital Health Passports Using Blockchain -- Use case on International Tourism During the COVID-19 Pandemic<br><i>Not specified</i>            | Nil       |
| C22                                                | ArXiv         | Chaudhari S. et al<br>2020     | Framework for a DLT Based COVID-19 Passport<br><i>Not specified</i>                                                                                           | Nil       |
| C23                                                | ArXiv         | Dima SF. et al                 | Hygiea: A secure, smart, privacy-preserving and                                                                                                               | Simulated |

|            |             |                                      |                                                                                                                           |                     |
|------------|-------------|--------------------------------------|---------------------------------------------------------------------------------------------------------------------------|---------------------|
|            |             | 2021                                 | interoperable Blockchain solution for the Covid-19 pandemic<br><i>Ethereum</i>                                            |                     |
| C24        | Pubmed      | Abid A. et al<br>2021                | NovidChain: Blockchain-based privacy-preserving platform for COVID-19 test/vaccine certificates<br><i>Ethereum</i>        | Simulated           |
| C25        | ArXiv       | Hernández-Ramos JL. et al<br>2021    | Sharing Pandemic Vaccination Certificates Through Blockchain: Case Study and Performance Evaluation<br><i>Hyperledger</i> | Simulated           |
|            |             | <i>Pandemic control/surveillance</i> |                                                                                                                           |                     |
| C26        | Pubmed      | Ouyang L. et al<br>2021              | A novel framework of collaborative early warning for COVID-19 based on blockchain and smart contracts<br><i>Ethereum</i>  | Simulated           |
| C27        | ArXiv       | Alsamhi SH. et al<br>2021            | Blockchain for Decentralized Multi-Drone to Combat COVID-19<br><i>Not specified</i>                                       | Nil                 |
| C28        | ArXiv       | Alsamhi SH. et al<br>2020            | Blockchain for Multi-Robot Collaboration to Combat COVID-19 and Future Pandemics<br><i>Ethereum</i>                       | Nil                 |
| C29        | IEEE Xplore | Alsamhi SH. et al<br>2020            | Blockchain-Empowered Multi-Robot Collaboration to Fight COVID-19 and Future Pandemics<br><i>Ethereum</i>                  | Nil                 |
| C30        | IEEE Xplore | Gupta R. et al<br>2020               | Blockchain-Envisioned Softwarized Multi-Swarming UAVs to Tackle COVID-19 Situations<br><i>Ethereum</i>                    | Simulated           |
| C31        | ArXiv       | Torky M. et al<br>2020               | COVID-19 Blockchain Framework: Innovative Approach<br><i>Hyperledger</i>                                                  | Nil                 |
| C32        | IEEE Xplore | Rimsan M. et al<br>2020              | COVID-19: A Novel Framework to Globally Track Coronavirus Infected Patients using Blockchain<br><i>Ethereum</i>           | Nil                 |
| C33        | ArXiv       | Choudhury H. et al<br>2020           | CovidChain: An Anonymity Preserving Blockchain Based Framework for Protection Against Covid-19<br><i>Not specified</i>    | Nil                 |
| C34        | ArXiv       | Alansar SA. et al<br>2021            | Efficient and Privacy-Preserving Infection Control System for Covid-19-Like Pandemics using Blockchain<br><i>RAFT</i>     | Simulated           |
| C35        | Pubmed      | Lee HA. et al<br>2020                | Global Infectious Disease Surveillance and Case Tracking System for COVID-19: Development Study<br><i>Not specified</i>   | Clinical case study |
| <b>C11</b> | IEEE Xplore | Klaine PV. et al                     | Privacy-Preserving Contact Tracing and Public Risk Assessment                                                             | Simulated           |

|                          |               |                                                            |                                                                                                                                                         |           |
|--------------------------|---------------|------------------------------------------------------------|---------------------------------------------------------------------------------------------------------------------------------------------------------|-----------|
|                          |               | 2020                                                       | Using Blockchain for COVID-19 Pandemic<br><i>Not specified</i>                                                                                          |           |
|                          |               | <i>Supply chain</i>                                        |                                                                                                                                                         |           |
| C36                      | IEEE Xplore   | Ahmad RW. et al<br>2021                                    | Blockchain-Based Forward Supply Chain and Waste Management for COVID-19 Medical Equipment and Supplies<br><i>Ethereum</i>                               | Nil       |
| C37                      | ArXiv         | Antal CD. et al<br>2021                                    | Blockchain Platform for COVID-19 Vaccine Supply Management<br><i>Ethereum</i>                                                                           | Simulated |
| <b>Non COVID related</b> |               |                                                            |                                                                                                                                                         |           |
|                          |               | <i>Authentication/Authorisation</i>                        |                                                                                                                                                         |           |
| N1                       | IEEE Xplore   | Li CT. et al<br>2020                                       | A Blockchain Based Data Aggregation and Group Authentication Scheme for Electronic Medical System<br><i>Not specified</i>                               | Nil       |
| N2                       | IEEE Xplore   | Zhu T. et al<br>2021                                       | A Patient-Centric Key Management Protocol for Healthcare Information System based on Blockchain<br><i>Ethereum</i>                                      | Simulated |
| N3                       | IEEE Xplore   | Adlam R. et al<br>2019                                     | A Permissioned Blockchain Approach to the Authorization Process in Electronic Health Records<br><i>Hyperledger</i>                                      | Nil       |
| N4                       | IEEE Xplore   | Xiang X. et al<br>2020                                     | A Permissioned Blockchain-Based Identity Management and User Authentication Scheme for E-Health Systems<br><i>Not specified</i>                         | Simulated |
| N5                       | ScienceDirect | Mohsin AH. et al<br>2019                                   | Based Blockchain-PSO-AES Techniques in Finger Vein Biometrics: A Novel Verification Secure Framework for Patient Authentication<br><i>Not specified</i> | Simulated |
| N6                       | ScienceDirect | Gibson A. et al<br>2020                                    | Protect Your Pacemaker: Blockchain based Authentication and Consented Authorization for Implanted Medical Devices<br><i>Hyperledger</i>                 | Simulated |
|                          |               | <i>Artificial intelligence/Big data/Federated learning</i> |                                                                                                                                                         |           |
| N7                       | ScienceDirect | Polap D. et al<br>2021                                     | Agent Architecture of an Intelligent Medical System Based on Federated Learning and Blockchain Technology<br><i>Not specified</i>                       | Simulated |
| N8                       | ScienceDirect | Kumar R. et al<br>2021                                     | An Integration of blockchain and AI for secure data sharing and detection of CT images for the hospitals<br><i>Not specified</i>                        | Simulated |
| N9                       | IEEE Xplore   | Bhattacharya P. et al<br>2019                              | BinDaaS: Blockchain-Based Deep-Learning as-a-Service in Healthcare 4.0 Applications                                                                     | Simulated |

|            |               |                                    |                                                                                                                                                                                                        |           |
|------------|---------------|------------------------------------|--------------------------------------------------------------------------------------------------------------------------------------------------------------------------------------------------------|-----------|
|            |               |                                    | <i>Not specified</i>                                                                                                                                                                                   |           |
| N10        | IEEE Xplore   | Jain S. et al<br>2020              | Blockchain and Machine Learning in Health Care and Management<br><i>Hyperledger</i>                                                                                                                    | Nil       |
| N11        | IEEE Xplore   | Zerka F. et al<br>2020             | Blockchain for Privacy Preserving and Trustworthy Distributed Machine Learning in Multicentric Medical Imaging (C-DistriM)<br><i>Ethereum</i>                                                          | Simulated |
| <b>N12</b> | Pubmed        | Kuo TT. et al<br>2020              | EXpectation Propagation LOGistic REgRession on permissioned blockCHAIN (ExplorerChain): decentralized online healthcare/genomics predictive model learning<br><i>MultiChain</i>                        | Simulated |
| N13        | IEEE Xplore   | Li B. et al<br>2019                | Exploiting Computation Power of Blockchain for Biomedical Image Segmentation<br><i>Not specified</i>                                                                                                   | Simulated |
| N14        | IEEE Xplore   | Juneja A. et al<br>2018            | Leveraging blockchain for retraining deep learning architecture in patient-specific arrhythmia classification<br><i>Hyperledger</i>                                                                    | Simulated |
| N15        | IEEE Xplore   | Zhang W. et al<br>2019             | Medical Image Collaborative Training Based on Multi-Blockchain<br><i>Not specified</i>                                                                                                                 | Simulated |
| N16        | ArXiv         | Kuo TT. et al<br>2018              | ModelChain: Decentralized Privacy-Preserving Healthcare Predictive Modeling Framework on Private Blockchain Networks<br><i>Not specified</i>                                                           | Nil       |
| N17        | Pubmed        | Jones M. et al<br>2019             | Privacy-Preserving Methods for Feature Engineering Using Blockchain: Review, Evaluation, and Proof of Concept<br><i>Oasis</i>                                                                          | Nil       |
| N18        | ScienceDirect | Al-Marridi AZ. et al<br>2021       | Reinforcement learning approaches for efficient and secure blockchain-powered smart health systems<br><i>Not specified</i>                                                                             | Simulated |
| N19        | Pubmed        | Tan TE. et al<br>2021              | Retinal photograph-based deep learning algorithms for myopia and a blockchain platform to facilitate artificial intelligence medical research: a retrospective multicohort study<br><i>Hyperledger</i> | Simulated |
| N20        | IEEE Xplore   | Rahman MA. et al<br>2020           | Secure and Provenance Enhanced Internet of Health Things Framework: A Blockchain Managed Federated Learning Approach<br><i>Ethereum</i>                                                                | Simulated |
| N21        | Pubmed        | Warnat-Herresthal S. et al<br>2021 | Swarm Learning for decentralized and confidential clinical machine learning<br><i>Ethereum</i>                                                                                                         | Simulated |

|                                 |              |                             |                                                                                                                                                |           |
|---------------------------------|--------------|-----------------------------|------------------------------------------------------------------------------------------------------------------------------------------------|-----------|
| N22                             | IEEE Xplore  | Shae Z. et al<br>2018       | Transform Blockchain into Distributed Parallel Computing Architecture for Precision Medicine<br><i>Not specified</i>                           | Nil       |
| <i>Clinical trials/Research</i> |              |                             |                                                                                                                                                |           |
| N23                             | IEEE Xplore  | Choudhury O. et al<br>2019  | A Blockchain Framework for Ensuring Data Quality in Multi-Organizational Clinical Trials<br><i>Hyperledger</i>                                 | Simulated |
| N24                             | Pubmed       | Lima VC. et al<br>2021      | A Permissioned Blockchain Network for Security and Sharing of De-identified Tuberculosis Research Data in Brazil<br><i>Kaleido</i>             | Nil       |
| N25                             | Pubmed       | Zhuang Y. et al<br>2018     | Applying Blockchain Technology for Health Information Exchange and Persistent Monitoring for Clinical Trials<br><i>Not specified</i>           | Nil       |
| N26                             | Pubmed       | Zhuang Y. et al<br>2019     | Applying Blockchain Technology to Enhance Clinical Trial Recruitment<br><i>Ethereum</i>                                                        | Simulated |
| N27                             | IEEE Xplore  | Park J. et al<br>2018       | CORUS: Blockchain-Based Trustworthy Evaluation System for Efficacy of Healthcare Remedies<br><i>Hyperledger</i>                                | Nil       |
| N28                             | Pubmed       | Hirano T. et al<br>2020     | Data Validation and Verification Using Blockchain in a Clinical Trial for Breast Cancer: Regulatory Sandbox<br><i>Hyperledger</i>              | Nil       |
| N29                             | Pubmed       | Zhuang Y. et al<br>2021     | Development of A Blockchain Framework for Virtual Clinical Trials<br><i>Ethereum</i>                                                           | Simulated |
| N30                             | SpringerLink | Albanese G. et al<br>2020   | Dynamic consent management for clinical trials via private blockchain technology<br><i>Hyperledger</i>                                         | Nil       |
| N31                             | Pubmed       | Omar IA. et al<br>2020      | Ensuring protocol compliance and data transparency in clinical trials using Blockchain smart contracts<br><i>Ethereum</i>                      | Nil       |
| N32                             | Pubmed       | Nugent T. et al<br>2016     | Improving data transparency in clinical trials using blockchain smart contracts<br><i>Ethereum</i>                                             | Simulated |
| N33                             | IEEE Xplore  | Rupa C. et al<br>2020       | Preserve Security to Medical Evidences using Blockchain Technology<br><i>Ethereum</i>                                                          | Simulated |
| N34                             | IEEE Xplore  | Ghadamyari M. et al<br>2019 | Privacy-Preserving Statistical Analysis of Health Data Using Paillier Homomorphic Encryption and Permissioned Blockchain<br><i>Hyperledger</i> | Simulated |

|                                   |                |                            |                                                                                                                                                      |           |
|-----------------------------------|----------------|----------------------------|------------------------------------------------------------------------------------------------------------------------------------------------------|-----------|
| N35                               | IEEE Xplore    | Angeletti F. et al<br>2017 | The Role of Blockchain and IoT in Recruiting Participants for Digital Clinical Trials<br><i>Ethereum</i>                                             | Simulated |
| N36                               | Pubmed         | Maslove DM. et al<br>2018  | Using Blockchain Technology to Manage Clinical Trials Data: A Proof-of-Concept Study<br><i>Ethereum</i>                                              | Nil       |
| <i>Contact tracing</i>            |                |                            |                                                                                                                                                      |           |
| N37                               | ScienceDirect  | Bandara E. et al<br>2021   | A blockchain empowered and privacy preserving digital contact tracing platform<br><i>Mystiko</i>                                                     | Simulated |
| N38                               | ScienceDirect  | Zhu P. et al<br>2021       | Enhancing Traceability of Infectious Diseases: A Blockchain-Based Approach<br><i>Not specified</i>                                                   | Simulated |
| <i>Electronic medical records</i> |                |                            |                                                                                                                                                      |           |
| N39                               | IEEE Xplore    | Chen J. et al<br>2018      | A Blockchain Application for Medical Information Sharing<br><i>Hyperledger</i>                                                                       | Nil       |
| N40                               | IEEE Xplore    | Daniel IA. et al<br>2020   | A Blockchain based solution for Managing Transplant Waiting Lists and Medical Records<br><i>Ethereum</i>                                             | Simulated |
| N41                               | ScienceDirect  | Lusetti M. et al<br>2020   | A Blockchain Based Solution for the Custody of Digital Files in Forensic Medicine<br><i>Hyperledger</i>                                              | Simulated |
| N42                               | IEEE Xplore    | Deka SK. et al<br>2020     | A Blockchain Based Technique for Storing Vaccination Records<br><i>Ethereum</i>                                                                      | Simulated |
| N43                               | Pubmed         | Hylock RH. et al<br>2019   | A Blockchain Framework for Patient-Centered Health Records and Exchange (HealthChain): Evaluation and Proof-of-Concept Study<br><i>Not specified</i> | Simulated |
| N44                               | IEEE Xplore    | Yang X. et al<br>2020      | A Blockchain-Assisted Verifiable Outsourced Attribute-Based Signcryption Scheme for EHRs Sharing in the Cloud<br><i>Ethereum</i>                     | Simulated |
| N45                               | Google Scholar | Peterson K. et al<br>2016  | A Blockchain-Based Approach to Health Information Exchange Networks<br><i>Not specified</i>                                                          | Nil       |
| N46                               | Google Scholar | Yang G. et al<br>2019      | A Blockchain-based Architecture for Securing Electronic Health Record Systems<br><i>Hyperledger</i>                                                  | Simulated |
| N47                               | IEEE Xplore    | Zhuang Y. et al<br>2020    | A Blockchain-based Architecture Framework for Secure Sharing of Personal Health Data                                                                 | Nil       |

|     |               |                              |                                                                                                                                       |           |
|-----|---------------|------------------------------|---------------------------------------------------------------------------------------------------------------------------------------|-----------|
|     |               |                              | <i>Ethereum</i>                                                                                                                       |           |
| N48 | IEEE Xplore   | Krishnan SSR. et al<br>2020  | A Blockchain-based Credibility Scoring Framework for Electronic Medical Records<br><i>Hyperledger</i>                                 | Nil       |
| N49 | Pubmed        | Sun J. et al<br>2020         | A Blockchain-based Framework for Electronic Medical Records Sharing with Fine-grained Access Control<br><i>Ethereum</i>               | Simulated |
| N50 | IEEE Xplore   | Alsharif A. et al<br>2020    | A Blockchain-based Medical Data Marketplace with Trustless Fair Exchange and Access Control<br><i>Ethereum</i>                        | Simulated |
| N51 | IEEE Xplore   | Liu X. et al<br>2019         | A Blockchain-Based Medical Data Sharing and Protection Scheme<br><i>Not specified</i>                                                 | Simulated |
| N52 | ScienceDirect | Huang H. et al<br>2020       | A blockchain-based scheme for privacy-preserving and secure sharing of medical data<br><i>Hyperledger</i>                             | Simulated |
| N53 | Pubmed        | Rajput AR. et al<br>2021     | A Blockchain-Based Secret-Data Sharing Framework for Personal Health Records in Emergency Condition<br><i>Hyperledger</i>             | Simulated |
| N54 | IEEE Xplore   | Jaiman V. et al<br>2020      | A Consent Model for Blockchain-Based Health Data Sharing Platforms<br><i>Ethereum</i>                                                 | Simulated |
| N55 | IEEE Xplore   | Yang G. et al<br>2018        | A Design of Blockchain-Based Architecture for the Security of Electronic Health Record (EHR) Systems<br><i>Not specified</i>          | Nil       |
| N56 | IEEE Xplore   | Poonguzhali N. et al<br>2020 | A Framework For Electronic Health Record Using Blockchain Technology<br><i>Ethereum</i>                                               | Simulated |
| N57 | IEEE Xplore   | Malamas V. et al<br>2020     | A Hierarchical Multi Blockchain for Fine Grained Access to Medical Data<br><i>Ethereum</i>                                            | Simulated |
| N58 | Pubmed        | Lima V. et al<br>2021        | A Mechanism for Verifying the Integrity and Immutability of Tuberculosis Data Using IOTA Distributed Ledger Technology<br><i>IOTA</i> | Simulated |
| N59 | IEEE Xplore   | Du Y. et al<br>2018          | A Medical Information Service Platform Based on Distributed Cloud and Blockchain<br><i>Hyperledger</i>                                | Nil       |
| N60 | ScienceDirect | Hussein AF. et al<br>2020    | A Medical Records Managing and Securing Blockchain Based System Supported by a Genetic Algorithm and Discrete Wavelet Transform       | Nil       |



|     |               |                                   |                                                                                                                                                              |           |
|-----|---------------|-----------------------------------|--------------------------------------------------------------------------------------------------------------------------------------------------------------|-----------|
|     |               |                                   | Not specified                                                                                                                                                |           |
| N61 | IEEE Xplore   | Li J. et al<br>2020               | A New Blockchain-based Electronic Medical Record Transferring System with Data Privacy<br><i>Not specified</i>                                               | Nil       |
| N62 | SpringerLink  | Chelladurai U. et al<br>2021      | A novel blockchain based electronic health record automation system for healthcare<br><i>Not specified</i>                                                   | Simulated |
| N63 | IEEE Xplore   | Singh AP. et al<br>2020           | A Novel Patient-Centric Architectural Framework for Blockchain-Enabled Healthcare Applications<br><i>Hyperledger</i>                                         | Simulated |
| N64 | IEEE Xplore   | Stamatellis C. et al<br>2020      | A Patient-Centric Health Information Exchange Framework Using Blockchain Technology<br><i>Ethereum</i>                                                       | Simulated |
| N65 | IEEE Xplore   | Sabir A. et al<br>2020            | A Practical Universal Consortium Blockchain Paradigm for Patient Data Portability on the Cloud Utilizing Delegated Identity Management<br><i>Hyperledger</i> | Nil       |
| N66 | Pubmed        | Rodriguez-Garcia M. et al<br>2021 | A privacy-preserving design for sharing demand-driven patient datasets over permissioned blockchains and P2P secure transfer<br><i>Hyperledger</i>           | Simulated |
| N67 | Pubmed        | Stamatellis C. et al<br>2020      | A Privacy-Preserving Healthcare Framework Using Hyperledger Fabric<br><i>Hyperledger</i>                                                                     | Simulated |
| N68 | IEEE Xplore   | Liu J. et al<br>2020              | A Privacy-Preserving Medical Data Sharing Scheme Based on Consortium Blockchain<br><i>Not specified</i>                                                      | Simulated |
| N69 | SpringerLink  | Latif RMA. et al<br>2020          | A remix IDE: smart contract-based framework for the healthcare sector by using Blockchain technology<br><i>Ethereumn</i>                                     | Nil       |
| N70 | IEEE Xplore   | Hasavari S. et al<br>2019         | A Secure and Scalable Data Source for Emergency Medical Care using Blockchain Technology<br><i>Hyperledger</i>                                               | Nil       |
| N71 | ScienceDirect | Shamshad S. et al<br>2020         | A Secure Blockchain-based e-Health Records Storage and Sharing Scheme<br><i>Not specified</i>                                                                | Simulated |
| N72 | Pubmed        | Qin Q. et al<br>2021              | A Secure Storage and Sharing Scheme of Stroke Electronic Medical Records Based on Consortium Blockchain<br><i>Not specified</i>                              | Nil       |

|     |                |                               |                                                                                                                                                                 |           |
|-----|----------------|-------------------------------|-----------------------------------------------------------------------------------------------------------------------------------------------------------------|-----------|
| N73 | ScienceDirect  | Garrido A. et al<br>2021      | A simulation-based AHP approach to analyze the scalability of EHR systems using blockchain technology in healthcare institutions<br><i>Ethereum and Bitcoin</i> | Simulated |
| N74 | Google Scholar | Kim K. et al<br>2017          | A Trusted Sharing Model for Patient Records based on Permissioned Blockchain<br><i>Ethereum</i>                                                                 | Simulated |
| N75 | Pubmed         | Zheng X. et al<br>2019        | Accelerating Health Data Sharing: A Solution Based on the Internet of Things and Distributed Ledger Technologies<br><i>IOTA</i>                                 | Simulated |
| N76 | IEEE Xplore    | Guo H. et al<br>2019          | Access Control for Electronic Health Records with Hybrid Blockchain-Edge Architecture<br><i>Hyperledger</i>                                                     | Simulated |
| N77 | Pubmed         | Dubovitskaya A. et al<br>2020 | ACTION-EHR: Patient-Centric Blockchain-Based Electronic Health Record Data Management for Cancer Care<br><i>Hyperledger</i>                                     | Nil       |
| N78 | Google Scholar | Hussein AF. et al<br>2019     | An Adaptive Biomedical Data Managing Scheme Based on the Blockchain Technique<br><i>Not specified</i>                                                           | Nil       |
| N79 | Pubmed         | Lee HA. et al<br>2020         | An Architecture and Management Platform for Blockchain-Based Personal Health Record Exchange: Development and Usability Study<br><i>Ethereum</i>                | Nil       |
| N80 | IEEE Xplore    | Du M. et al<br>2020           | An Optimized Consortium Blockchain for Medical Information Sharing<br><i>Not specified</i>                                                                      | Simulated |
| N81 | ScienceDirect  | Roehrs A. et al<br>2019       | Analyzing the Performance of a Blockchain-based Personal Health Record Implementation<br><i>Not specified</i>                                                   | Simulated |
| N82 | ScienceDirect  | Dagher GG. et al<br>2018      | Ancile: Privacy-preserving Framework for Access Control and Interoperability of Electronic Health Records Using Blockchain Technology<br><i>Ethereum</i>        | Nil       |
| N83 | Pubmed         | Mendes D. et al<br>2018       | Anonymized Distributed PHR Using Blockchain for Openness and Non-Repudiation Guarantee<br><i>Hyperledger</i>                                                    | Nil       |
| N84 | IEEE Xplore    | Peng Li<br>2019               | Application of BlockChain in the Field of Traditional Chinese Medicine<br><i>Not specified</i>                                                                  | Nil       |
| N85 | Pubmed         | Tith D. et al                 | Application of Blockchain to Maintaining Patient Records in                                                                                                     | Nil       |

|            |             |                               |                                                                                                                                                                                     |                |
|------------|-------------|-------------------------------|-------------------------------------------------------------------------------------------------------------------------------------------------------------------------------------|----------------|
|            |             | 2020                          | Electronic Health Record for Enhanced Privacy, Scalability, and Availability<br><i>Hyperledger</i>                                                                                  |                |
| N86        | IEEE Xplore | Ghaffaripour S. et al<br>2019 | Application of Blockchain to Patient-Centric Access Control in Medical Data Management Systems<br><i>Hyperledger</i>                                                                | Nil            |
| N87        | Pubmed      | Zhang L. et al<br>2021        | Application of Laparoscopy in Comprehensive Staging Operation of Ovarian Cancer Based on Electronic Medical Blockchain Technology<br><i>Not specified</i>                           | Clinical trial |
| <b>N25</b> | Pubmed      | Zhuang Y. et al<br>2018       | Applying Blockchain Technology for Health Information Exchange and Persistent Monitoring for Clinical Trials<br><i>Not specified</i>                                                | Nil            |
| N88        | Pubmed      | Tanaka K. et al<br>2019       | Assessment of Traceability Implementation of a Cross-Institutional Secure Data Collection System Based on Distributed Standardized EMR Storage<br><i>Hyperledger and BigchainDB</i> | Simulated      |
| N89        | IEEE Xplore | Chen X. et al<br>2019         | Asynchronous Blockchain-based Privacy-preserving Training Framework for Disease Diagnosis<br><i>Not specified</i>                                                                   | Simulated      |
| N90        | IEEE Xplore | Guo H. et al<br>2020          | Attribute-based Multi-Signature and Encryption for EHR Management: A Blockchain-based Solution<br><i>Hyperledger</i>                                                                | Simulated      |
| N91        | IEEE Xplore | Vora J. et al<br>2018         | BHEEM: A Blockchain-Based Framework for Securing Electronic Health Records<br><i>Ethereum</i>                                                                                       | Nil            |
| N92        | IEEE Xplore | Ai Baqari M. et al<br>2020    | Biometric-Based Blockchain EHR System (BBEHR)<br><i>Not specified</i>                                                                                                               | Nil            |
| N93        | IEEE Xplore | Jiang S. et al<br>2018        | BlochIE: A BLOCkchain-Based Platform for Healthcare Information Exchange<br><i>Not specified</i>                                                                                    | Simulated      |
| N94        | IEEE Xplore | Zhang X. et al<br>2018        | Block-Based Access Control for Blockchain-Based Electronic Medical Records (EMRs) Query in eHealth<br><i>Not specified</i>                                                          | Simulated      |
| N95        | Pubmed      | Hussien YM. et al<br>2021     | Blockchain-Based Access Control Scheme for Secure Shared Personal Health Records over Decentralised Storage<br><i>Ethereum</i>                                                      | Simulated      |
| N96        | Pubmed      | Horng JH. et al<br>2021       | Blockchain-Based Reversible Data Hiding for Securing Medical Images                                                                                                                 | Simulated      |

|      |                |                                |                                                                                                                                   |           |
|------|----------------|--------------------------------|-----------------------------------------------------------------------------------------------------------------------------------|-----------|
|      |                |                                | <i>Not specified</i>                                                                                                              |           |
| N97  | IEEE Xplore    | Nguyen DC. et al<br>2020       | Blockchain and Edge Computing for Decentralized EMRs Sharing in Federated Healthcare<br><i>Hyperledger</i>                        | Simulated |
| N98  | ScienceDirect  | Bhavin M. et al<br>2021        | Blockchain and Quantum Blind Signature-based Hybrid Scheme for Healthcare 5.0 Applications<br><i>Hyperledger</i>                  | Simulated |
| N99  | Google Scholar | Cyran MA. et al<br>2018        | Blockchain as a Foundation for Sharing Healthcare Data<br><i>Ethereum</i>                                                         | Nil       |
| N100 | IEEE Xplore    | Pussewalage HSG. et al<br>2019 | Blockchain Based Delegatable Access Control Scheme for a Collaborative E-Health Environment<br><i>Not specified</i>               | Simulated |
| N101 | ScienceDirect  | Chen L. et al<br>2019          | Blockchain Based Searchable Encryption for Electronic Health Record Sharing<br><i>Ethereum</i>                                    | Simulated |
| N102 | IEEE Xplore    | Maddine MM. et al<br>2020      | Blockchain for Giving Patients Control Over Their Medical Records<br><i>Ethereum</i>                                              | Simulated |
| N103 | IEEE Xplore    | Jabbar R. et al<br>2020        | Blockchain Technology for Healthcare: Enhancing Shared Electronic Health Record Interoperability and Integrity<br><i>Ethereum</i> | Simulated |
| N104 | ScienceDirect  | Aruna Sri PSG. et al<br>2020   | Blockchain Technology for Secure Medical Data Sharing Using Consensus Mechanism<br><i>Not specified</i>                           | Simulated |
| N105 | SpringerLink   | Gan C. et al<br>2020           | Blockchain-based access control scheme with incentive mechanism for eHealth systems: patient as supervisor<br><i>Ethereum</i>     | Nil       |
| N106 | IEEE Xplore    | Hirtan L. et al<br>2019        | Blockchain-Based Approach for e-Health Data Access Management with Privacy Protection<br><i>Hyperledger</i>                       | Simulated |
| N107 | IEEE Xplore    | Li C. et al<br>2019            | Blockchain-Based Bidirectional Updates on Fine-Grained Medical Data<br><i>Ethereum</i>                                            | Nil       |
| N108 | Pubmed         | Li H. et al<br>2018            | Blockchain-Based Data Preservation System for Medical Data<br><i>Ethereum</i>                                                     | Simulated |
| N109 | ArXiv          | Jabarulla MY. et al<br>2020    | Blockchain-Based Distributed Patient-Centric Image Management System<br><i>Ethereum</i>                                           | Simulated |
| N110 | ScienceDirect  | Huang H. et al                 | Blockchain-based eHealth System for Auditable EHRs Manipulation                                                                   | Simulated |

|             |               |                             |                                                                                                                                                   |                      |
|-------------|---------------|-----------------------------|---------------------------------------------------------------------------------------------------------------------------------------------------|----------------------|
|             |               | 2020                        | in Cloud Environments<br><i>Not specified</i>                                                                                                     |                      |
| N111        | ScienceDirect | Tanwar S. et al<br>2020     | Blockchain-based Electronic Healthcare Record System for Healthcare 4.0 Applications<br><i>Hyperledger</i>                                        | Simulated            |
| N112        | IEEE Xplore   | Jiamsawat W. et al<br>2021  | Blockchain-Based Electronic Medical Records Management of Hospital Emergency Ward<br><i>Not specified</i>                                         | Simulated            |
| N113        | IEEE Xplore   | Carter G. et al<br>2019     | Blockchain-Based Interoperable Electronic Health Record Sharing Framework<br><i>Ethereum</i>                                                      | Nil                  |
| N114        | IEEE Xplore   | Sharma B. et al<br>2020     | Blockchain-based Interoperable Healthcare using Zero-Knowledge Proofs and Proxy Re-Encryption<br><i>Ethereum</i>                                  | Simulated            |
| N115        | IEEE Xplore   | Zheng X. et al<br>2018      | Blockchain-based Personal Health Data Sharing System Using Cloud Storage<br><i>Ethereum</i>                                                       | Nil                  |
| N116        | IEEE Xplore   | Wang S. et al<br>2019       | Blockchain-Based Personal Health Records Sharing Scheme With Data Integrity Verifiable<br><i>Ethereum</i>                                         | Simulated            |
| N117        | IEEE Xplore   | Xiaodong Y. et al<br>2019   | Blockchain-Based Secure and Searchable EHR Sharing Scheme<br><i>Not specified</i>                                                                 | Simulated            |
| N118        | IEEE Xplore   | Sun J. et al<br>2020        | Blockchain-Based Secure Storage and Access Scheme For Electronic Medical Records in IPFS<br><i>Not specified</i>                                  | Simulated            |
| N119        | IEEE Xplore   | Aggarwal S. et al<br>2021   | Blockchain-Based UAV Path Planning for Healthcare 4.0: Current Challenges and the Way Ahead<br><i>Not specified</i>                               | Simulated            |
| <b>N120</b> | ArXiv         | Nkenyereye L. et al<br>2020 | Blockchain-Enabled EHR Framework for Internet of Medical Things<br><i>Ethereum</i>                                                                | Simulated            |
| N121        | ScienceDirect | Chen M. et al<br>2021       | Blockchain-Enabled Healthcare System for Detection of Diabetes<br><i>Not specified</i>                                                            | Simulated            |
| N122        | Pubmed        | Lo YS. et al<br>2019        | Blockchain-Enabled iWellChain Framework Integration With the National Medical Referral System: Development and Usability Study<br><i>Ethereum</i> | Clinical application |
| N123        | IEEE Xplore   | Wang S. et al<br>2018       | Blockchain-Powered Parallel Healthcare Systems Based on the ACP Approach<br><i>Not specified</i>                                                  | Nil                  |

|      |                |                            |                                                                                                                                                    |           |
|------|----------------|----------------------------|----------------------------------------------------------------------------------------------------------------------------------------------------|-----------|
| N124 | Google Scholar | Rahmadika S. et al<br>2018 | Blockchain Technology for Providing an Architecture Model of Decentralized Personal Health Information<br><i>Not specified</i>                     | Nil       |
| N125 | ArXiv          | Rojo J. et al<br>2021      | Blockchains' Federation for Integrating Distributed Health Data Using a Patient-centered Approach<br><i>Hyperledger</i>                            | Simulated |
| N126 | IEEE Xplore    | Liu J. et al<br>2018       | BPDS: A Blockchain Based Privacy-Preserving Data Sharing for Electronic Medical Records<br><i>Not specified</i>                                    | Nil       |
| N127 | Pubmed         | Abunadi I. et al<br>2021   | BSF-EHR: Blockchain Security Framework for Electronic Health Records of Patients<br><i>Ethereum</i>                                                | Simulated |
| N128 | IEEE Xplore    | Cao S. et al<br>2020       | CEPS: A Cross-Blockchain based Electronic Health Records Privacy-Preserving Scheme<br><i>Polkadot</i>                                              | Simulated |
| N129 | SpringerLink   | Munoz DJ. et al<br>2019    | ClinicAppChain: A Low-Cost Blockchain Hyperledger Solution for Healthcare<br><i>Hyperledger</i>                                                    | Simulated |
| N130 | Pubmed         | Zhu S. et al<br>2019       | Cloud Health Resource Sharing Based on Consensus-Oriented Blockchain Technology: Case Study on a Breast Tumor Diagnosis Service<br><i>Ethereum</i> | Simulated |
| N131 | IEEE Xplore    | Wang Y. et al<br>2019      | Cloud-Assisted EHR Sharing With Security and Privacy Preservation via Consortium Blockchain<br><i>Ethereum</i>                                     | Simulated |
| N132 | ScienceDirect  | Cao S. et al<br>2019       | Cloud-assisted Secure eHealth Systems for Tamper-proofing EHR Via Blockchain<br><i>Ethereum</i>                                                    | Simulated |
| N133 | Pubmed         | Mense A. et al<br>2018     | Concept for Sharing Distributed Personal Health Records with Blockchains<br><i>Ethereum</i>                                                        | Nil       |
| N134 | Pubmed         | Margheri A. et al<br>2020  | Decentralised Provenance for Healthcare Data<br><i>Hyperledger</i>                                                                                 | Simulated |
| N135 | IEEE Xplore    | Reen G. et al<br>2019      | Decentralized Patient Centric e- Health Record Management System using Blockchain and IPFS<br><i>Ethereum</i>                                      | Simulated |
| N136 | Google Scholar | Tong SJ. et al<br>2019     | Decentralized Privacy-Preserving Platform for Clinical Data Sharing and Analysis                                                                   | Simulated |

|      |              |                        |                                                                                                                                                                     |                                      |
|------|--------------|------------------------|---------------------------------------------------------------------------------------------------------------------------------------------------------------------|--------------------------------------|
|      |              |                        | <i>Hyperledger</i>                                                                                                                                                  |                                      |
| N137 | SpringerLink | Mubarakali A. 2019     | Design a Secure and Efficient Health Record Transaction Utilizing Block Chain (SEHRTB) Algorithm for Health Record Transaction in Block Chain<br><i>Hyperledger</i> | Simulated                            |
| N138 | IEEE Xplore  | Xu L. et al 2019       | Design of a Credible Blockchain-Based E-Health Records (CB-EHRS) Platform<br><i>Not specified</i>                                                                   | Simulated                            |
| N139 | Pubmed       | Cheng X. et al 2020    | Design of a Secure Medical Data Sharing Scheme Based on Blockchain<br><i>Not specified</i>                                                                          | Simulated                            |
| N140 | Pubmed       | Sung M. et al 2020     | Developing a Mobile App for Monitoring Medical Record Changes Using Blockchain: Development and Usability Study<br><i>Tendermint</i>                                | Clinical trials<br>- User experience |
| N141 | Pubmed       | Park S. et al 2020     | Developing a Mobile App for Patients to Monitor Medical Record Changes Using Blockchain<br><i>Tendermint</i>                                                        | Nil                                  |
| N142 | Pubmed       | Li P. et al 2019       | DMMS: A Decentralized Blockchain Ledger for the Management of Medication Histories<br><i>Hyperledger</i>                                                            | Simulated                            |
| N143 | IEEE Xplore  | Rajput AR. et al 2019  | EACMS: Emergency Access Control Management System for Personal Health Record Based on Blockchain<br><i>Hyperledger</i>                                              | Simulated                            |
| N144 | IEEE Xplore  | Akkaoui R. et al 2020  | EdgeMediChain: A Hybrid Edge Blockchain-Based Framework for Health Data Exchange<br><i>Ethereum</i>                                                                 | Simulated                            |
| N145 | IEEE Xplore  | Mukherji A. et al 2020 | Efficient and Scalable Electronic Health Record Management using Permissioned Blockchain Technology<br><i>Hypeledger</i>                                            | Nil                                  |
| N146 | Pubmed       | Kanagi K. et al 2021   | Efficient Clinical Data Sharing Framework Based on Blockchain Technology<br><i>Ethereum</i>                                                                         | Clinical trial                       |
| N147 | IEEE Xplore  | Hyla T. et al 2019     | eHealth Integrity Model Based on a Permissioned Blockchain<br><i>Not specified</i>                                                                                  | Nil                                  |
| N148 | IEEE Xplore  | Niu S. et al 2019      | Electronic Health Record Sharing Scheme With Searchable Attribute-Based Encryption on Blockchain<br><i>Not specified</i>                                            | Simulated                            |
| N149 | IEEE Xplore  | Martínez A. et al      | Electronic Medical Records Management in Health Organizations                                                                                                       | Simulated                            |

|      |               |                               |                                                                                                                                                                |           |
|------|---------------|-------------------------------|----------------------------------------------------------------------------------------------------------------------------------------------------------------|-----------|
|      |               | 2018                          | using a Technology Architecture based on Blockchain<br><i>Hyperledger</i>                                                                                      |           |
| N150 | ArXiv         | Shevkar S. et al<br>2020      | EMRs with Blockchain : A distributed democratised Electronic Medical Record sharing platform<br><i>Hyperledger</i>                                             | Nil       |
| N151 | IEEE Xplore   | Xiao Z. et al<br>2018         | EMRShare: A Cross-Organizational Medical Data Sharing and Management Framework Using Permissioned Blockchain<br><i>Hyperledger</i>                             | Simulated |
| N152 | Pubmed        | Cunningham J. et al<br>2019   | Enabling Patient Control of Personal Electronic Health Records Through Distributed Ledger Technology<br><i>Ethereum</i>                                        | Simulated |
| N153 | Pubmed        | Liu H. et al<br>2020          | Enhancing Privacy and Data Security across Healthcare Applications Using Blockchain and Distributed Ledger Concepts<br><i>Not specified</i>                    | Simulated |
| N154 | IEEE Xplore   | Palani U. et al<br>2020       | Ethereum Blockchain Based Healthcare Industry Ecosystem<br><i>Ethereum</i>                                                                                     | Nil       |
| N155 | ScienceDirect | Zhang P. et al<br>2018        | FHIRChain: Applying Blockchain to Securely and Scalably Share Clinical Data<br><i>Ethereum</i>                                                                 | Nil       |
| N156 | ScienceDirect | Wang Z. et al<br>2020         | GuardHealth: Blockchain Empowered Secure Data Management and Graph Convolutional Network Enabled Anomaly Detection in Smart Healthcare<br><i>Not specified</i> | Simulated |
| N157 | IEEE Xplore   | Parameswari CD. et al<br>2020 | Healthcare Data Protection Based on Blockchain using Solidity<br><i>Ethereum</i>                                                                               | Nil       |
| N158 | Pubmed        | Chenthara S. et al<br>2020    | Healthchain: A novel framework on privacy preservation of electronic health records using blockchain technology<br><i>Hyperledger</i>                          | Simulated |
| N159 | Pubmed        | Gutiérrez O. et al<br>2020    | HealthyBlock: Blockchain-Based IT Architecture for Electronic Medical Records Resilient to Connectivity Failures<br><i>Ethereum</i>                            | Simulated |
| N160 | ScienceDirect | Miyachi K. et al<br>2021      | hOCBS: A Privacy-Preserving Blockchain Framework for Healthcare Data Leveraging an On-Chain and Off-Chain System Design<br><i>Ethereum</i>                     | Nil       |
| N161 | IEEE Xplore   | Ito K. et al<br>2018          | i-Blockchain: A Blockchain-Empowered Individual-Centric Framework for Privacy-Preserved Use of Personal Health Data<br><i>Not specified</i>                    | Nil       |
| N162 | ScienceDirect | Guimarães T. et al            | ICU Data Management - A Permissioned Blockchain Approach                                                                                                       | Nil       |



|             |             |                              |                                                                                                                                    |           |
|-------------|-------------|------------------------------|------------------------------------------------------------------------------------------------------------------------------------|-----------|
|             |             | 2020                         | <i>Hyperledger</i>                                                                                                                 |           |
| N163        | IEEE Xplore | Mikula T. et al<br>2018      | Identity and Access Management with Blockchain in Electronic Healthcare Records<br><i>Hyperledger</i>                              | Simulated |
| N164        | Pubmed      | Koptyra K. et al<br>2021     | Imagechain-Application of Blockchain Technology for Images<br><i>Not specified</i>                                                 | Nil       |
| N165        | Pubmed      | Roehrs A. et al<br>2021      | Integrating multiple blockchains to support distributed personal health records<br><i>Hyperledger</i>                              | Simulated |
| N166        | Pubmed      | Park YR. et al<br>2019       | Is Blockchain Technology Suitable for Managing Personal Health Records? Mixed-Methods Study to Test Feasibility<br><i>Ethereum</i> | Simulated |
| N167        | IEEE Xplore | Alamir O. et al<br>2019      | M-Blocks (Medical Blocks): A blockchain based approach for patient record management using IBM Hyperledger<br><i>Hyperledger</i>   | Nil       |
| N168        | IEEE Xplore | Misbhauddin M. et al<br>2020 | MedAccess: A Scalable Architecture for Blockchain-based Health Record Management<br><i>Ethereum</i>                                | Nil       |
| N169        | IEEE Xplore | Huang J. et al<br>2019       | MedBloc: A Blockchain-Based Secure EHR System for Sharing and Accessing Medical Data<br><i>Hyperledger</i>                         | Simulated |
| N170        | Pubmed      | Fan K. et al<br>2018         | MedBlock: Efficient and Secure Medical Data Sharing Via Blockchain<br><i>Not specified</i>                                         | Simulated |
| N171        | IEEE Xplore | Daraghmi E. et al<br>2019    | MedChain: A Design of Blockchain-Based System for Medical Records Access and Permissions Management<br><i>Ethereum</i>             | Simulated |
| <b>N172</b> | IEEE Xplore | Abdellatif AA. et al<br>2021 | MEdge-Chain: Leveraging Edge Computing and Blockchain for Efficient Medical Data Exchange<br><i>Not specified</i>                  | Simulated |
| N173        | Pubmed      | Tian H. et al<br>2020        | Medical Data Management on Blockchain with Privacy<br><i>Hyperledger</i>                                                           | Simulated |
| N174        | IEEE Xplore | Yang X. et al<br>2020        | Medical Data Sharing Scheme Based on Attribute Cryptosystem and Blockchain Technology<br><i>Not specified</i>                      | Simulated |
| N175        | IEEE Xplore | Seo J. et al<br>2020         | Medical Image Sharing System using Hyperledger Fabric Blockchain<br><i>Hyperledger</i>                                             | Nil       |
| N176        | Pubmed      | Zhou T. et al                | Med-PPHIS: Blockchain-Based Personal Healthcare Information                                                                        | Simulated |

|             |               |                             |                                                                                                                                               |           |
|-------------|---------------|-----------------------------|-----------------------------------------------------------------------------------------------------------------------------------------------|-----------|
|             |               | 2019                        | System for National Physique Monitoring and Scientific Exercise Guiding<br><i>DAG, Quorum</i>                                                 |           |
| N177        | IEEE Xplore   | Azaria A. et al<br>2016     | MedRec: Using Blockchain for Medical Data Access and Permission Management<br><i>Ethereum</i>                                                 | Nil       |
| N178        | SpringerLink  | Pournaghi SM. et al<br>2020 | MedSBA: a Novel and Secure Scheme to Share Medical Data Based on Blockchain Technology and Attribute-Based Encryption<br><i>Not specified</i> | Simulated |
| N179        | ScienceDirect | Guimarães T. et al<br>2020  | Modular Blockchain Implementation in Intensive Medicine<br><i>Hyperledger</i>                                                                 | Nil       |
| N180        | Pubmed        | Sun B. et al<br>2021        | Obstetrics Nursing and Medical Health System Based on Blockchain Technology<br><i>Not specified</i>                                           | Simulated |
| N181        | Pubmed        | Roehrs A. et al<br>2017     | OmniPHR: A distributed architecture model to integrate personal health records<br><i>Not specified</i>                                        | Simulated |
| N182        | IEEE Xplore   | Buzachis A. et al<br>2019   | On the Design of a Blockchain-as-a-Service-Based Health Information Exchange (BaaS-HIE) System for Patient Monitoring<br><i>Not specified</i> | Simulated |
| N183        | IEEE Xplore   | Toshniwal B. et al<br>2019  | PACEX: PATient-Centric EMR eXchange in Healthcare Systems using Blockchain<br><i>Ethereum</i>                                                 | Simulated |
| <b>N184</b> | Pubmed        | Cernian A. et al<br>2020    | PatientDataChain: A Blockchain-Based Approach to Integrate Personal Health Records<br><i>Modex BCDB</i>                                       | Simulated |
| N185        | IEEE Xplore   | Jiang S. et al<br>2019      | Patients-Controlled Secure and Privacy-Preserving EHRs Sharing Scheme Based on Consortium Blockchain<br><i>Ethereum</i>                       | Simulated |
| N186        | IEEE Xplore   | Al Asad N. et al<br>2020    | Permission-Based Blockchain with Proof of Authority for Secured Healthcare Data Sharing<br><i>Not specified</i>                               | Nil       |
| N187        | ScienceDirect | Sharma Y. et al<br>2020     | Preserving the Privacy of Electronic Health Records using Blockchain<br><i>Hyperledger</i>                                                    | Simulated |
| N188        | IEEE Xplore   | Juyal S. et al<br>2020      | Privacy and Security of IoT based Skin Monitoring System using Blockchain Approach<br><i>Not specified</i>                                    | Nil       |
| N189        | IEEE Xplore   | Nortey RN. et al            | Privacy Module for Distributed Electronic Health Records(EHRs)                                                                                | Nil       |

|             |               |                               |                                                                                                                                                   |           |
|-------------|---------------|-------------------------------|---------------------------------------------------------------------------------------------------------------------------------------------------|-----------|
|             |               | 2019                          | Using the Blockchain<br><i>Hyperledger</i>                                                                                                        |           |
| N190        | ScienceDirect | Al Omar A. et al<br>2019      | Privacy-friendly platform for healthcare data in cloud based on<br>blockchain environment<br><i>Ethereum</i>                                      | Simulated |
| <b>N191</b> | IEEE Xplore   | Shen M. et al<br>2019         | Privacy-Preserving Image Retrieval for Medical IoT Systems: A<br>Blockchain-Based Approach<br><i>Ethereum</i>                                     | Simulated |
| N192        | IEEE Xplore   | Bak S. et al<br>2019          | Protection of EEG Data using Blockchain Platform<br><i>Ethereum</i>                                                                               | Simulated |
| N193        | IEEE Xplore   | Wutthikarn R. et al<br>2018   | Prototype of Blockchain in Dental care service application based on<br>Hyperledger Composer in Hyperledger Fabric framework<br><i>Hyperledger</i> | Nil       |
| N194        | IEEE Xplore   | Navaratna L. et al<br>2020    | Providing Electronic Health Care Services Through A Private<br>Permissioned Blockchain<br><i>Hyperledger</i>                                      | Simulated |
| N195        | ArXiv         | Wang H. et al<br>2021         | Que Bian: An Electronic Medical Record Management System<br>on Blockchain<br><i>Hyperledger</i>                                                   | Nil       |
| N196        | SpringerLink  | Kumar R. et al<br>2020        | Scalable and Secure Access Control Policy for Healthcare System<br>Using Blockchain and Enhanced Bell–LaPadula Model<br><i>Hyperledger</i>        | Simulated |
| N197        | IEEE Xplore   | Fernandes A. et al<br>2020    | Scalable Architecture for sharing EHR using the Hyperledger<br>Blockchain<br><i>Hyperledger</i>                                                   | Simulated |
| N198        | IEEE Xplore   | Donawa A. et al<br>2019       | Scaling Blockchains to Support Electronic Health Records for<br>Hospital Systems<br><i>Not specified</i>                                          | Simulated |
| N199        | IEEE Xplore   | Ramani V. et al<br>2018       | Secure and Efficient Data Accessibility in Blockchain Based<br>Healthcare Systems<br><i>Ethereum</i>                                              | Simulated |
| N200        | IEEE Xplore   | Mahore V. et al<br>2019       | Secure and Privacy Focused Electronic Health Record Management<br>System using Permissioned Blockchain<br><i>Hyperledger</i>                      | Simulated |
| N201        | Pubmed        | Dubovitskaya A. et al<br>2017 | Secure and Trustable Electronic Medical Records Sharing using<br>Blockchain<br><i>Hyperledger</i>                                                 | Nil       |
| <b>N202</b> | Pubmed        | Wang H. et al                 | Secure Cloud-Based EHR System Using Attribute-Based                                                                                               | Nil       |

|             |               |                                  |                                                                                                                                               |           |
|-------------|---------------|----------------------------------|-----------------------------------------------------------------------------------------------------------------------------------------------|-----------|
|             |               | 2018                             | Cryptosystem and Blockchain<br><i>Not specified</i>                                                                                           |           |
| N203        | ScienceDirect | Shuaib K. et al<br>2021          | Secure decentralized electronic health records sharing system based on blockchains<br><i>Hyperledger</i>                                      | Simulated |
| N204        | ScienceDirect | Usman M. et al<br>2020           | Secure Electronic Medical Records Storage and Sharing Using Blockchain Technology<br><i>Hyperledger</i>                                       | Nil       |
| N205        | IEEE Xplore   | Kumar N. et al<br>2020           | Secure Sharing of Health Data Using Hyperledger Fabric Based on Blockchain Technology<br><i>Hyperledger</i>                                   | Nil       |
| N206        | SpringerLink  | Nagasubramanian G. et al<br>2020 | Securing e-Health Records Using Keyless Signature Infrastructure Blockchain Technology in the Cloud<br><i>KSI Blockchain</i>                  | Simulated |
| N207        | IEEE Xplore   | Zghaibeh M. et al<br>2020        | SHealth: A Blockchain-Based Health System With Smart Contracts Capabilities<br><i>Hyperledger</i>                                             | Nil       |
| N208        | IEEE Xplore   | Andola N. et al<br>2019          | SHEMB: A Secure Approach for Healthcare Management System Using Blockchain<br><i>Ethereum</i>                                                 | Simulated |
| N209        | IEEE Xplore   | Rahman MA. et al<br>2018         | Spatial Blockchain-Based Secure Mass Screening Framework for Children With Dyslexia<br><i>Ethereum and Hyperledger</i>                        | Simulated |
| N210        | ScienceDirect | Zou RP. et al<br>2021            | SPChain: Blockchain-based medical data sharing and privacy-preserving eHealth system<br><i>RepuCoin</i>                                       | Simulated |
| <b>N211</b> | IEEE Xplore   | Abdellatif AA. et al<br>2020     | ssHealth: Toward Secure, Blockchain-Enabled Healthcare Systems<br><i>Not specified</i>                                                        | Simulated |
| <b>N212</b> | Pubmed        | Kuo TT. et al<br>2020            | The Anatomy of a Distributed Predictive Modeling Framework: Online Learning, Blockchain network, And consensus algorithm<br><i>MultiChain</i> | Nil       |
| N213        | Pubmed        | Xiao Y. et al<br>2021            | The HealthChain Blockchain for Electronic Health Records: Development Study<br><i>Not specified</i>                                           | Simulated |
| N214        | IEEE Xplore   | Misic VB. Et al<br>2019          | Towards a Blockchain-Based Healthcare Information System : Invited Paper<br><i>Not specified</i>                                              | Nil       |
| N215        | IEEE Xplore   | De Oliveria MT. et al            | Towards a Blockchain-Based Secure Electronic Medical Record for                                                                               | Simulated |

|                                          |             |                              |                                                                                                                              |           |
|------------------------------------------|-------------|------------------------------|------------------------------------------------------------------------------------------------------------------------------|-----------|
|                                          |             | 2019                         | Healthcare Applications<br><i>MultiChain</i>                                                                                 |           |
| N216                                     | IEEE Xplore | Jin H. et al<br>2019         | Toward Secure, Privacy-Preserving, and Interoperable Medical Data Sharing via Blockchain<br><i>Ethereum</i>                  | Simulated |
| N217                                     | Pubmed      | Zhang A. et al<br>2018       | Towards Secure and Privacy-Preserving Data Sharing in e-Health Systems via Consortium Blockchain<br><i>Ethereum</i>          | Simulated |
| N218                                     | IEEE Xplore | Cao S. et al<br>2020         | Toward Secure Storage in Cloud-based eHealth Systems: A Blockchain-Assisted Approach<br><i>Ethereum</i>                      | Simulated |
| <b>N22</b>                               | IEEE Xplore | Shae Z. et al<br>2018        | Transform Blockchain into Distributed Parallel Computing Architecture for Precision Medicine<br><i>Not specified</i>         | Nil       |
| N219                                     | ArXiv       | Gupta P. et al<br>2019       | Usage of Permissioned Blockchain Architecture for Big Data in Electronic Medical Records<br><i>BigChain</i>                  | Nil       |
| N220                                     | IEEE Xplore | Zhou X. et al<br>2020        | User-Controlled, Auditable, Cross-Jurisdiction Sharing of Healthcare Data Mediated by a Public Blockchain<br><i>Ethereum</i> | Nil       |
| N221                                     | IEEE Xplore | Goel U. et al<br>2019        | Using Healthcare Authority and Patient Blockchains to Develop a Tamper-Proof Record Tracking System<br><i>Ethereum</i>       | Nil       |
| <i>Epidemic/Infection control</i>        |             |                              |                                                                                                                              |           |
| N222                                     | IEEE Xplore | Khan MS. et al<br>2020       | Prediction of Dengue Infected Areas using A Novel Blockchain based Crowdsourcing Framework<br><i>Ethereum</i>                | Nil       |
| <b>N211</b>                              | IEEE Xplore | Abdellatif AA. et al<br>2020 | ssHealth: Toward Secure, Blockchain-Enabled Healthcare Systems<br><i>Not specified</i>                                       | Simulated |
| <i>Foundational healthcare framework</i> |             |                              |                                                                                                                              |           |
| N223                                     | IEEE Xplore | Quasim MT. et al<br>2020     | A Blockchain based Secured Healthcare Framework<br><i>Not specified</i>                                                      | Simulated |
| N224                                     | IEEE Xplore | Swetha MS. et al<br>2020     | Blockchain enabled secure healthcare Systems<br><i>Hyperledger</i>                                                           | Nil       |
| N225                                     | IEEE Xplore | Curbera F. et al<br>2019     | Blockchain: An enabler for healthcare and life sciences transformation<br><i>Hyperledger</i>                                 | Simulated |
| N226                                     | Pubmed      | Ghayvat H. et al<br>2021     | CP-BDHCA: Blockchain-based Confidentiality-Privacy preserving Big Data scheme for healthcare clouds and applications         | Simulated |

|            |                |                              |                                                                                                                                                                                 |                |
|------------|----------------|------------------------------|---------------------------------------------------------------------------------------------------------------------------------------------------------------------------------|----------------|
|            |                |                              | <i>Not specified</i>                                                                                                                                                            |                |
| N227       | Pubmed         | Zhuang Y. et al<br>2020      | Generalizable Layered Blockchain Architecture for Health Care Applications: Development, Case Studies, and Evaluation<br><i>Ethereum</i>                                        | Simulated      |
| N228       | Pubmed         | Purohit S. et al<br>2021     | HonestChain: Consortium blockchain for protected data sharing in health information systems<br><i>Hyperledger</i>                                                               | Simulated      |
|            |                | <i>Genomics</i>              |                                                                                                                                                                                 |                |
| N229       | IEEE Xplore    | Shuaib K. et al<br>2020      | A Layered Blockchain Framework for Healthcare and Genomics<br><i>Ethereum and Hyperledger</i>                                                                                   | Nil            |
| N230       | Pubmed         | Jin XL. et al<br>2019        | Application of a Blockchain Platform to Manage and Secure Personal Genomic Data: A Case Study of LifeCODE.ai in China<br><i>Ethereum</i>                                        | Simulated      |
| N231       | Google Scholar | Lee S. et al<br>2018         | BAQALC: Blockchain Applied Lossless Efficient Transmission of DNA Sequencing Data for Next Generation Medical Informatics<br><i>Not specified</i>                               | Simulated      |
| N232       | Pubmed         | Glicksberg BS. et al<br>2020 | Blockchain-Authenticated Sharing of Genomic and Clinical Outcomes Data of Patients With Cancer: A Prospective Cohort Study<br><i>Ethereum</i>                                   | Clinical trial |
| N233       | IEEE Xplore    | Aung STY. et al<br>2020      | Blockchain-Based Implementation for Integration of DNA Profiles Information Systems<br><i>Ethereum</i>                                                                          | Simulated      |
| N234       | Pubmed         | Pattengale ND. et al<br>2020 | Decentralized genomics audit logging via permissioned blockchain ledgering<br><i>MultiChain</i>                                                                                 | Simulated      |
| N235       | Pubmed         | Ma S. et al<br>2020          | Efficient logging and querying for blockchain-based cross-site genomic dataset access audit<br><i>MultiChain</i>                                                                | Simulated      |
| <b>N12</b> | Pubmed         | Kuo TT. et al<br>2020        | EXpectation Propagation LOGistic REgRession on permissioned blockCHAIN (ExplorerChain): decentralized online healthcare/genomics predictive model learning<br><i>MultiChain</i> | Simulated      |
| N236       | Pubmed         | Kuo TT. et al<br>2020        | iDASH secure genome analysis competition 2018: blockchain genomic data access logging, homomorphic encryption on GWAS, and DNA segment searching<br><i>MultiChain</i>           | Simulated      |
| N237       | Pubmed         | Ozdayi MS. et al<br>2020     | Leveraging blockchain for immutable logging and querying across multiple sites                                                                                                  | Simulated      |

|             |             |                              |                                                                                                                                                                              |                |
|-------------|-------------|------------------------------|------------------------------------------------------------------------------------------------------------------------------------------------------------------------------|----------------|
|             |             |                              | <i>MultiChain</i>                                                                                                                                                            |                |
| N238        | IEEE Xplore | Neto MM. et al<br>2020       | Research Opportunities for E-health Applications with DNA Sequence Data using Blockchain Technology<br><i>BigchainDB</i>                                                     | Simulated      |
| N239        | IEEE Xplore | Genesy Project Srl<br>2020   | The Genesy Model for a Blockchain-based Fair Ecosystem of Genomic Data<br><i>Hyperledger</i>                                                                                 | Nil            |
| N240        | Pubmed      | Gürsoy G. et al<br>2020      | Using Blockchain to Log Genome Dataset Access: Efficient Storage and Query<br><i>MultiChain</i>                                                                              | Simulated      |
| N241        | Pubmed      | Gürsoy G. et al<br>2020      | Using Ethereum Blockchain to Store and Query Pharmacogenomics Data Via Smart Contracts<br><i>Ethereum</i>                                                                    | Simulated      |
| <b>N212</b> | Pubmed      | Kuo TT. et al<br>2020        | The Anatomy of a Distributed Predictive Modeling Framework: Online Learning, Blockchain Network, and Consensus Algorithm<br><i>MultiChain</i>                                | Nil            |
|             |             | <i>Healthcare services</i>   |                                                                                                                                                                              |                |
| <b>N40</b>  | IEEE Xplore | Daniel IA. et al<br>2020     | A Blockchain based solution for Managing Transplant Waiting Lists and Medical Records<br><i>Ethereum</i>                                                                     | Simulated      |
| N242        | IEEE Xplore | Kaurav RS. et al<br>2021     | Blockchain for Emergency Vehicle Routing in Healthcare Services: An Integrated Secure and Trustworthy System<br><i>Ethereum</i>                                              | Simulated      |
| N243        | IEEE Xplore | Khezr S. et al<br>2020       | Blockchain-based Model for Sharing Activities of Daily Living in Healthcare Applications<br><i>Hyperledger</i>                                                               | Simulated      |
| N244        | IEEE Xplore | Li P. et al<br>2019          | ChainSDI: A Software-Defined Infrastructure for Regulation-Compliant Home-Based Healthcare Services Secured by Blockchains<br><i>Ethereum</i>                                | Simulated      |
| N245        | Pubmed      | Niu Y. et al<br>2021         | Influence of Standardized Nursing Management of Hospital Based on Smart Electronic Medical Blockchain on Nursing Quality of Digestive Endoscopy Room<br><i>Not specified</i> | Clinical trial |
| N236        | IEEE Xplore | Gupta R. et al<br>2020       | VAHAK: A Blockchain-based Outdoor Delivery Scheme using UAV for Healthcare 4.0 Services<br><i>Ethereum</i>                                                                   | Simulated      |
| N247        | Pubmed      | Paglialonga A. et al<br>2019 | Use of Alternative Currencies, Blockchain Technology, and Predictive Analytics for Chronic Disease Prevention: A Conceptual Model                                            | Nil            |

|             |               |                            |                                                                                                                                         |           |
|-------------|---------------|----------------------------|-----------------------------------------------------------------------------------------------------------------------------------------|-----------|
|             |               |                            | <i>Ethereum</i>                                                                                                                         |           |
|             |               |                            | <i>Insurance</i>                                                                                                                        |           |
| N248        | IEEE Xplore   | Gera J. et al<br>2020      | Blockchain Technology for Fraudulent Practices in Insurance Claim Process<br><i>Hyperledger</i>                                         | Simulated |
| N249        | Pubmed        | Mackey TK. et al<br>2020   | Combating Health Care Fraud and Abuse: Conceptualization and Prototyping Study of a Blockchain Antifraud Framework<br><i>Ethereum</i>   | Nil       |
| N250        | IEEE Xplore   | Saldamli G. et al<br>2020  | Health Care Insurance Fraud Detection Using Blockchain<br><i>BigchainDB</i>                                                             | Nil       |
| N251        | ScienceDirect | Thenmozhi M. et al<br>2021 | Implementing Blockchain Technologies for Health Insurance Claim Processing in Hospitals<br><i>Ethereum</i>                              | Nil       |
| N252        | Pubmed        | Zhou L. et al<br>2018      | MISStore: a Blockchain-Based Medical Insurance Storage System<br><i>Ethereum</i>                                                        | Simulated |
| <b>N202</b> | Pubmed        | Wang H. et al<br>2018      | Secure Cloud-Based EHR System Using Attribute-Based Cryptosystem and Blockchain<br><i>Not specified</i>                                 | Nil       |
|             |               |                            | <i>Medical diagnostics</i>                                                                                                              |           |
| N253        | ArXiv         | Samaniego M. et al<br>2020 | Access Control Management for Computer-Aided Diagnosis Systems using Blockchain<br><i>Ethereum</i>                                      | Simulated |
| N254        | IEEE Xplore   | Talukder AK. et al<br>2018 | Proof of Disease: A Blockchain Consensus Protocol for Accurate Medical Decisions and Reducing the Disease Burden<br><i>Ethereum</i>     | Nil       |
|             |               |                            | <i>Medical education</i>                                                                                                                |           |
| N255        | IEEE Xplore   | Rathod J. et al<br>2020    | Using Blockchain Technology for Continuing Medical Education Credits System<br><i>Ethereum</i>                                          | Nil       |
|             |               |                            | <i>Mobile health/Remote monitoring/Internet of Things</i>                                                                               |           |
| N256        | IEEE Xplore   | Paliokas I. et al<br>2019  | A Blockchain Platform in Connected Medical-Device Environments: Trustworthy technology to guard against cyberthreats<br><i>Ethereum</i> | Nil       |
| N257        | ScienceDirect | Wang J. et al<br>2020      | A Blockchain-based eHealthcare System Interoperating with WBANs<br><i>Hyperledger</i>                                                   | Simulated |
| N258        | ScienceDirect | Islam N. et al<br>2019     | A Blockchain-based Fog Computing Framework for Activity Recognition as an Application to e-Healthcare Services<br><i>Not specified</i>  | Simulated |



|      |               |                             |                                                                                                                                        |           |
|------|---------------|-----------------------------|----------------------------------------------------------------------------------------------------------------------------------------|-----------|
| N259 | ScienceDirect | Islam A. et al<br>2020      | A Blockchain-based Secure Healthcare Scheme With the Assistance of Unmanned Aerial Vehicle in Internet of Things<br><i>Hyperledger</i> | Nil       |
| N260 | IEEE Xplore   | Fotopoulos F. et al<br>2020 | A Blockchain-enabled Architecture for IoMT Device Authentication<br><i>Hyperledger</i>                                                 | Nil       |
| N261 | Pubmed        | Taralunga DD. et al<br>2021 | A Blockchain-Enabled Framework for mHealth Systems<br><i>Ethereum</i>                                                                  | Simulated |
| N262 | ArXiv         | Nguyen DC. et al<br>2021    | A Cooperative Architecture of Data Offloading and Sharing for Smart Healthcare with Blockchain<br><i>Ethereum</i>                      | Simulated |
| N263 | IEEE Xplore   | Uddin MA. et al<br>2019     | A Decentralized Patient Agent Controlled Blockchain for Remote Patient Monitoring<br><i>Not specified</i>                              | Simulated |
| N264 | Pubmed        | Ali MS. et al<br>2020       | A Decentralized Peer-to-Peer Remote Health Monitoring System<br><i>Ethereum</i>                                                        | Simulated |
| N265 | Pubmed        | Dwivedi AD. et al<br>2019   | A Decentralized Privacy-Preserving Healthcare Blockchain for IoT<br><i>Not specified</i>                                               | Nil       |
| N266 | IEEE Xplore   | Aujla GS. et al<br>2020     | A Decoupled Blockchain Approach for Edge-Envisioned IoT-Based Healthcare Monitoring<br><i>Not specified</i>                            | Simulated |
| N267 | IEEE Xplore   | Malamas V. et al<br>2019    | A Forensics-by-Design Management Framework for Medical Devices Based on Blockchain<br><i>Ethereum</i>                                  | Nil       |
| N268 | SpringerLink  | Rathee G. et al<br>2019     | A hybrid framework for multimedia data processing in IoT-healthcare using blockchain technology<br><i>Not specified</i>                | Simulated |
| N269 | IEEE Xplore   | Srivastava G. et al<br>2019 | A Light and Secure Healthcare Blockchain for IoT Medical Devices<br><i>Not specified</i>                                               | Nil       |
| N270 | IEEE Xplore   | Rahman MA. et al<br>2020    | A Natural User Interface and Blockchain-Based In-Home Smart Health Monitoring System<br><i>Hyperledger</i>                             | Simulated |
| N271 | Pubmed        | Karakaya A. et al<br>2021   | A novel IoT-based health and tactical analysis model with fog computing<br><i>Not specified</i>                                        | Simulated |
| N272 | IEEE Xplore   | Wahdud MAH. et al<br>2020   | A Patient Centric Agent Assisted Private Blockchain on Hyperledger Fabric for Managing Remote Patient Monitoring<br><i>Hyperledger</i> | Simulated |
| N273 | Pubmed        | Abdur Rahman M. et al       | A Secure Occupational Therapy Framework for Monitoring Cancer                                                                          | Simulated |

|      |               |                              |                                                                                                                                                             |           |
|------|---------------|------------------------------|-------------------------------------------------------------------------------------------------------------------------------------------------------------|-----------|
|      |               | 2019                         | Patients' Quality of Life<br><i>Not specified</i>                                                                                                           |           |
| N274 | IEEE Xplore   | Pham HL. et al<br>2018       | A Secure Remote Healthcare System for Hospital Using Blockchain Smart Contract<br><i>Ethereum</i>                                                           | Nil       |
| N7   | ScienceDirect | Polap D. et al<br>2021       | Agent Architecture of an Intelligent Medical System Based on Federated Learning and Blockchain Technology,<br><i>Not specified</i>                          | Simulated |
| N275 | IEEE Xplore   | Vasileanu A. et al<br>2020   | Ambient Assisted Living Environment based on Blockchain for Elderly Care<br><i>Ethereum</i>                                                                 | Nil       |
| N276 | Pubmed        | Shu H. et al<br>2020         | An Efficient Certificateless Aggregate Signature Scheme for Blockchain-Based Medical Cyber Physical Systems<br><i>Not specified</i>                         | Simulated |
| N277 | SpringerLink  | Veeramakali T. et al<br>2021 | An intelligent internet of things-based secure healthcare framework using blockchain technology with an optimal deep learning model<br><i>Not specified</i> | Simulated |
| N278 | IEEE Xplore   | Muofhe M. et al<br>2019      | An Internet of Things-Based System Integrated with Blockchain to Manage Patient Data in the Healthcare Sector<br><i>Ethereum</i>                            | Nil       |
| N279 | IEEE Xplore   | Attia O. et al<br>2019       | An IoT-Blockchain Architecture Based on Hyperledger Framework for Healthcare Monitoring Application<br><i>Hyperledger</i>                                   | Nil       |
| N280 | ScienceDirect | Brogan J. et al<br>2018      | Authenticating Health Activity Data Using Distributed Ledger Technologies<br><i>IOTA</i>                                                                    | Simulated |
| N281 | ArXiv         | Srivastava G. et al<br>2018  | Automated Remote Patient Monitoring: Data Sharing and Privacy Using Blockchain<br><i>Not specified</i>                                                      | Simulated |
| N282 | IEEE Xplore   | Garg N. et al<br>2020        | BAKMP-IoMT: Design of Blockchain Enabled Authenticated Key Management Protocol for Internet of Medical Things Deployment<br><i>Not specified</i>            | Simulated |
| N283 | IEEE Xplore   | Islam A. et al<br>2019       | BHMUS: Blockchain Based Secure Outdoor Health Monitoring Scheme Using UAV in Smart City<br><i>Ethereum</i>                                                  | Simulated |
| N284 | IEEE Xplore   | Saliem M. et al<br>2019      | BloMT: Blockchain for the Internet of Medical Things<br><i>Not specified</i>                                                                                | Simulated |
| N285 | IEEE Xplore   | Ray PP. et al                | BloTHR: Electronic Health Record Servicing Scheme in IoT-                                                                                                   | Simulated |

|             |               |                                    |                                                                                                                                                                     |           |
|-------------|---------------|------------------------------------|---------------------------------------------------------------------------------------------------------------------------------------------------------------------|-----------|
|             |               | 2021                               | Blockchain Ecosystem<br><i>Not specified</i>                                                                                                                        |           |
| N286        | IEEE Xplore   | Azbeq K. et al<br>2018             | Blockchain and IoT for Security and Privacy: A Platform for Diabetes Self-management<br><i>Not specified</i>                                                        | Nil       |
| N287        | IEEE Xplore   | Nehra V. et al<br>2021             | Blockchain Enabled Ambient Assisted Living for Critically ill Patients<br><i>Not specified</i>                                                                      | Simulated |
| N288        | IEEE Xplore   | Nguyen DC. et al<br>2019           | Blockchain for Secure EHRs Sharing of Mobile Cloud Based E-Health Systems<br><i>Ethereum</i>                                                                        | Simulated |
| N289        | ScienceDirect | Uddin M. et al<br>2020             | Blockchain Leveraged Decentralized IoT eHealth Framework<br><i>Ethereum</i>                                                                                         | Simulated |
| N290        | SpringerLink  | Alqaralleh BAY. et al<br>2021      | Blockchain-assisted secure image transmission and diagnosis model on Internet of Medical Things Environment<br><i>Not specified</i>                                 | Simulated |
| N291        | IEEE Xplore   | Rahman MDA. et al<br>2018          | Blockchain-Based Mobile Edge Computing Framework for Secure Therapy Applications<br><i>Ethereum and Hyperledger</i>                                                 | Simulated |
| N292        | IEEE Xplore   | Alblooshi M. et al<br>2018         | Blockchain-based Ownership Management for Medical IoT (MIoT) Devices<br><i>Ethereum</i>                                                                             | Nil       |
| N293        | IEEE Xplore   | Hossein KM. et al<br>2019          | Blockchain-Based Privacy-Preserving Healthcare Architecture<br><i>Not specified</i>                                                                                 | Nil       |
| N294        | IEEE Xplore   | Hathaliya J. et al<br>2019         | Blockchain-Based Remote Patient Monitoring in Healthcare 4.0<br><i>Not specified</i>                                                                                | Nil       |
| N295        | IEEE Xplore   | Shynu PG. et al<br>2021            | Blockchain-Based Secure Healthcare Application for Diabetic-Cardio Disease Prediction in Fog Computing<br><i>Not specified</i>                                      | Simulated |
| N296        | Pubmed        | Liu X. et al<br>2020               | Blockchain-Enabled Contextual Online Learning under Local Differential Privacy for Coronary Heart Disease Diagnosis in Mobile Edge Computing<br><i>Not specific</i> | Simulated |
| <b>N120</b> | ArXiv         | Nkenyereye L. et al<br>2020        | Blockchain-Enabled EHR Framework for Internet of Medical Things<br><i>Ethereum</i>                                                                                  | Simulated |
| N297        | Pubmed        | Gonzalez-Amarillo C. et al<br>2021 | Blockchain-IoT Sensor (BIoTS): A Solution to IoT-Ecosystems Security Issues<br><i>Ethereum</i>                                                                      | Simulated |
| N298        | IEEE Xplore   | Ray PP. et al                      | BLWN: Blockchain-Based Lightweight Simplified Payment                                                                                                               | Simulated |

|      |             |                                     |                                                                                                                                                                                                               |           |
|------|-------------|-------------------------------------|---------------------------------------------------------------------------------------------------------------------------------------------------------------------------------------------------------------|-----------|
|      |             | 2020                                | Verification in IoT-Assisted e-Healthcare<br><i>Bitcoin</i>                                                                                                                                                   |           |
| N299 | IEEE Xplore | Yazdinejad A. et al<br>2020         | Decentralized Authentication of Distributed Patients in Hospital Networks Using Blockchain<br><i>Not specified</i>                                                                                            | Simulated |
| N300 | Pubmed      | Hawig D. et al<br>2019              | Designing a Distributed Ledger Technology System for Interoperable and General Data Protection Regulation-Compliant Health Data Exchange: A Use Case in Blood Glucose Data<br><i>IOTA</i>                     | Simulated |
| N301 | IEEE Xplore | Wang R. et al<br>2019               | Distributed Security Architecture Based on Blockchain for Connected Health: Architecture, Challenges, and Approaches<br><i>RAFT</i>                                                                           | Simulated |
| N302 | IEEE Xplore | Abou-Nassar EM. et al<br>2020       | DITrust Chain: Towards Blockchain-Based Trust Models for Sustainable Healthcare IoT Systems<br><i>Ripple</i>                                                                                                  | Nil       |
| N303 | Pubmed      | Pawar P. et al<br>2021              | eHealthChain-a blockchain-based personal health information management system<br><i>Hyperledger</i>                                                                                                           | Nil       |
| N304 | Pubmed      | Fernández-Caramés TM. et al<br>2019 | Enabling the Internet of Mobile Crowdsourcing Health Things: A Mobile Fog Computing, Blockchain and IoT Based Continuous Glucose Monitoring System for Diabetes Mellitus Research and Care<br><i>Ethereum</i> | Simulated |
| N305 | IEEE Xplore | Meng W. et al<br>2019               | Enhancing Medical Smartphone Networks via Blockchain-Based Trust Management Against Insider Attacks<br><i>Not specified</i>                                                                                   | Simulated |
| N306 | IEEE Xplore | Egala BS. et al<br>2021             | Fortified-Chain: A Blockchain Based Framework for Security and Privacy Assured Internet of Medical Things with Effective Access Control<br><i>Ethereum</i>                                                    | Simulated |
| N307 | IEEE Xplore | Bhattacharya P. et al<br>2020       | HeaL: A Blockchain-Envisioned Signcryption Scheme for Healthcare IoT Ecosystems<br><i>Not specified</i>                                                                                                       | Simulated |
| N308 | IEEE Xplore | Ni W. et al<br>2019                 | HealChain: A Decentralized Data Management System for Mobile Healthcare Using Consortium Blockchain<br><i>Not specified</i>                                                                                   | Simulated |
| N309 | Pubmed      | Ejaz M. et al<br>2021               | Health-BlockEdge: Blockchain-Edge Framework for Reliable Low-Latency Digital Healthcare Applications<br><i>Not specified</i>                                                                                  | Simulated |

|             |                |                              |                                                                                                                                                                 |           |
|-------------|----------------|------------------------------|-----------------------------------------------------------------------------------------------------------------------------------------------------------------|-----------|
| N310        | Pubmed         | Javed IT. et al<br>2021      | Health-ID: A Blockchain-Based Decentralized Identity Management for Remote Healthcare<br><i>Ethereum</i>                                                        | Simulated |
| N311        | IEEE Xplore    | Singh HS. et al<br>2020      | Health Monitoring and Analysis using IPFS and Blockchain<br><i>DAG</i>                                                                                          | Nil       |
| N312        | Pubmed         | Griggs KN. et al<br>2018     | Healthcare Blockchain System Using Smart Contracts for Secure Automated Remote Patient Monitoring<br><i>Ethereum</i>                                            | Nil       |
| N313        | IEEE Xplore    | Xu J. et al<br>2019          | Healthchain: A Blockchain-Based Privacy Preserving Scheme for Large-Scale Health Data<br><i>Hyperledger</i>                                                     | Simulated |
| N314        | IEEE Xplore    | Dey T. et al<br>2017         | HealthSense: A medical use case of Internet of Things and blockchain<br><i>Not specified</i>                                                                    | Nil       |
| N315        | ArXiv          | Abdellatif A. et al<br>2020  | I-Health: Leveraging Edge Computing and Blockchain for Epidemic Management<br><i>Not specified</i>                                                              | Simulated |
| N316        | ScienceDirect  | Shukla S. et al<br>2021      | Identification and Authentication in Healthcare Internet-of-Things Using Integrated Fog Computing Based Blockchain Model<br><i>Ethereum</i>                     | Simulated |
| N317        | IEEE Xplore    | Liang X. et al<br>2017       | Integrating blockchain for data sharing and collaboration in mobile healthcare applications<br><i>Not specified</i>                                             | Simulated |
| N318        | Pubmed         | Hameed K. et al<br>2021      | Integration of 5G and Block-Chain Technologies in Smart Telemedicine Using IoT<br><i>Not specified</i>                                                          | Simulated |
| N319        | Google Scholar | Wang H. et al<br>2020        | IoT based Clinical Sensor Data Management and Transfer using Blockchain Technology<br><i>Ethereum</i>                                                           | Simulated |
| N320        | Pubmed         | Kumar A. et al<br>2020       | Lightweight Proof of Game (LPoG): A Proof of Work (PoW)'s Extended Lightweight Consensus Algorithm for Wearable Kidneys<br><i>Not specified</i>                 | Simulated |
| <b>N172</b> | IEEE Xplore    | Abdellatif AA. et al<br>2021 | MEdge-Chain: Leveraging Edge Computing and Blockchain for Efficient Medical Data Exchange<br><i>Not specified</i>                                               | Simulated |
| N321        | Pubmed         | Rosa BMG. et al<br>2021      | NFC-Powered Implantable Device for On-Body Parameters Monitoring With Secure Data Exchange Link to a Medical Blockchain Type of Network<br><i>Not specified</i> | Simulated |

|             |              |                              |                                                                                                                                                                    |           |
|-------------|--------------|------------------------------|--------------------------------------------------------------------------------------------------------------------------------------------------------------------|-----------|
| N322        | IEEE Xplore  | Saha S. et al<br>2020        | On the Design of Blockchain-Based Access Control Protocol for IoT-Enabled Healthcare Applications<br><i>Not specified</i>                                          | Simulated |
| <b>N184</b> | Pubmed       | Cernian A. et al<br>2020     | PatientDataChain: A Blockchain-Based Approach to Integrate Personal Health Records<br><i>Modex BCDB</i>                                                            | Simulated |
| N323        | IEEE Xplore  | Tomaz AEB. et al<br>2020     | Preserving Privacy in Mobile Health Systems Using Non-Interactive Zero-Knowledge Proof and Blockchain<br><i>Ethereum</i>                                           | Simulated |
| <b>N191</b> | IEEE Xplore  | Shen M. et al<br>2019        | Privacy-Preserving Image Retrieval for Medical IoT Systems: A Blockchain-Based Approach<br><i>Ethereum</i>                                                         | Simulated |
| N324        | Pubmed       | Satamraju KP. et al<br>2020  | Proof of Concept of Scalable Integration of Internet of Things and Blockchain in Healthcare<br><i>Ethereum</i>                                                     | Simulated |
| N325        | IEEE Xplore  | Rachakonda L. et al<br>2020  | SaYoPillow: Blockchain-Integrated Privacy-Assured IoMT Framework for Stress Management Considering Sleeping Habits<br><i>Ethereum</i>                              | Simulated |
| N326        | Pubmed       | Motohashi T. et al<br>2019   | Secure and Scalable mHealth Data Management Using Blockchain Combined With Client Hashchain: System Design and Validation<br><i>Hyperledger</i>                    | Simulated |
| N327        | Pubmed       | Kim HJ. et al<br>2021        | Smart Decentralization of Personal Health Records with Physician Apps and Helper Agents on Blockchain: Platform Design and Implementation Study<br><i>Ethereum</i> | Nil       |
| N328        | Pubmed       | Lakhan A. et al<br>2021      | Smart-Contract Aware Ethereum and Client-Fog-Cloud Healthcare System<br><i>Ethereum</i>                                                                            | Simulated |
| <b>N211</b> | IEEE Xplore  | Abdellatif AA. et al<br>2020 | ssHealth: Toward Secure, Blockchain-Enabled Healthcare Systems<br><i>Not specified</i>                                                                             | Simulated |
| N329        | Pubmed       | Ichikawa D. et al<br>2017    | Tamper-Resistant Mobile Health Using Blockchain Technology<br><i>Hyperledger</i>                                                                                   | Simulated |
| N330        | Pubmed       | Jamil F. et al<br>2020       | Towards a Remote Monitoring of Patient Vital Signs Based on IoT-Based Blockchain Integrity Management Platforms in Smart Hospitals<br><i>Hyperledger</i>           | Simulated |
| N331        | SpringerLink | Randhir K. et al<br>2021     | Towards Design and Implementation of Security and Privacy Framework for Internet of Medical Things (IoMT) by Leveraging Blockchain and IPFS Technology             | Simulated |

|            |                |                               |                                                                                                                                                                                                                        |                |
|------------|----------------|-------------------------------|------------------------------------------------------------------------------------------------------------------------------------------------------------------------------------------------------------------------|----------------|
|            |                |                               | <i>Ethereum</i>                                                                                                                                                                                                        |                |
| N332       | Pubmed         | Jamil F. et al<br>2021        | Towards Secure Fitness Framework Based on IoT-Enabled Blockchain Network Integrated with Machine Learning Algorithms<br><i>Hyperledger</i>                                                                             | Simulated      |
|            |                | <i>Notarisation</i>           |                                                                                                                                                                                                                        |                |
| N333       | ScienceDirect  | Kleinaki AS. et al<br>2018    | A Blockchain-Based Notarization Service for Biomedical Knowledge Retrieval<br><i>Ethereum</i>                                                                                                                          | Simulated      |
|            |                | <i>Patient consent</i>        |                                                                                                                                                                                                                        |                |
| N334       | Pubmed         | Velmovitsky PE. et al<br>2020 | A Blockchain-Based Consent Platform for Active Assisted Living: Modeling Study and Conceptual Framework<br><i>Hyperledger</i>                                                                                          | Nil            |
| N335       | Pubmed         | Benchoufi M. et al<br>2017    | Blockchain protocols in clinical trials: Transparency and traceability of consent<br><i>Bitcoin</i>                                                                                                                    | Clinical trial |
| N336       | IEEE Xplore    | Lee AR. et al<br>2020         | Coded Dynamic Consent framework using blockchain for healthcare information exchange<br><i>Not specified</i>                                                                                                           | Nil            |
| N337       | IEEE Xplore    | Agbo CC. et al<br>2020        | Design and Implementation of a Blockchain-Based E-Health Consent Management Framework<br><i>Hyperledger</i>                                                                                                            | Nil            |
| N338       | Google Scholar | Kim TM. et al<br>2021         | DynamiChain: Development of Medical Blockchain Ecosystem Based on Dynamic Consent System<br><i>Hyperledger</i>                                                                                                         | Simulated      |
| <b>N30</b> | SpringerLink   | Albanese G. et al<br>2020     | Dynamic consent management for clinical trials via private blockchain technology<br><i>Hyperledger</i>                                                                                                                 | Nil            |
| N339       | Google Scholar | Despotou G. et al<br>2020     | Evaluation of Patient Perception Towards Dynamic Health Data Sharing Using Blockchain Based Digital Consent with the Dovetail Digital Consent Application: A Cross Sectional Exploratory Study<br><i>Not specified</i> | Clinical trial |
| N340       | Pubmed         | Tith D. et al<br>2020         | Patient Consent Management by a Purpose-Based Consent Model for Electronic Health Record Based on Blockchain Technology<br><i>Hyperledger</i>                                                                          | Nil            |
|            |                | <i>Supply chain</i>           |                                                                                                                                                                                                                        |                |
| N341       | IEEE Xplore    | Sahoo M. et al<br>2019        | A Blockchain Based Framework Secured by ECDSA to Curb Drug Counterfeiting<br><i>Not specified</i>                                                                                                                      | Nil            |

|      |                |                            |                                                                                                                                                                                  |           |
|------|----------------|----------------------------|----------------------------------------------------------------------------------------------------------------------------------------------------------------------------------|-----------|
| N342 | IEEE Xplore    | Chenthara S. et al<br>2020 | A Blockchain based model for Curbing Doctors Shopping and Ensuring Provenance Management<br><i>Hyperledger</i>                                                                   | Simulated |
| N343 | IEEE Xplore    | Zhu P. et al<br>2020       | A Blockchain Based Solution for Medication Anti-Counterfeiting and Traceability<br><i>Not specified</i>                                                                          | Simulated |
| N344 | IEEE Xplore    | Musamih A. et al<br>2021   | A Blockchain-Based Approach for Drug Traceability in Healthcare Supply Chain<br><i>Ethereum</i>                                                                                  | Nil       |
| N345 | Google Scholar | Jamil F. et al<br>2019     | A novel medical blockchain model for drug supply chain integrity management in a smart hospital<br><i>Hyperledger</i>                                                            | Simulated |
| N346 | Pubmed         | Qiu Z. et al<br>2021       | A Novel Structure of Blockchain Applied in Vaccine Quality Control: Double-Chain Structured Blockchain System for Vaccine Anticounterfeiting and Traceability<br><i>Ethereum</i> | Simulated |
| N347 | IEEE Xplore    | Ying B. et al<br>2019      | A Secure Blockchain-based Prescription Drug Supply in Health-care Systems<br><i>Not specified</i>                                                                                | Simulated |
| N348 | Pubmed         | Wang Z. et al<br>2021      | A Traditional Chinese Medicine Traceability System Based on Lightweight Blockchain<br><i>Not specified</i>                                                                       | Simulated |
| N349 | IEEE Xplore    | Peng S. et al<br>2020      | An Efficient Double-Layer Blockchain Method for Vaccine Production Supervision<br><i>Not specified</i>                                                                           | Simulated |
| N350 | ScienceDirect  | Yong B. et al<br>2020      | An Intelligent Blockchain-based System for Safe Vaccine Supply and Supervision<br><i>Ethereum</i>                                                                                | Simulated |
| N351 | IEEE Xplore    | Omar IA. et al<br>2021     | Automating Procurement Contracts in the Healthcare Supply Chain Using Blockchain Smart Contracts<br><i>Ethereum</i>                                                              | Simulated |
| N352 | Pubmed         | Uddin M. et al<br>2021     | Blockchain for drug traceability: Architectures and open challenges<br><i>Hyperledger</i>                                                                                        | Nil       |
| N353 | ScienceDirect  | Uddin M. et al<br>2021     | Blockchain Medledger: Hyperledger Fabric Enabled Drug Traceability System for Counterfeit Drugs in Pharmaceutical Industry<br><i>Hyperledger</i>                                 | Nil       |
| N354 | Pubmed         | Sylim P. et al<br>2018     | Blockchain Technology for Detecting Falsified and Substandard Drugs in Distribution: Pharmaceutical Supply Chain Intervention                                                    | Simulated |



|      |              |                               |                                                                                                                                                      |           |
|------|--------------|-------------------------------|------------------------------------------------------------------------------------------------------------------------------------------------------|-----------|
|      |              |                               | <i>Ethereum and Hyperledger</i>                                                                                                                      |           |
| N355 | IEEE Xplore  | Sadri S. et al<br>2021        | Blockchain Traceability in Healthcare: Blood Donation Supply Chain<br><i>Ethereum</i>                                                                | Simulated |
| N356 | IEEE Xplore  | Garcia HM. et al<br>2020      | Blockchain-based Website Solution for Controlling the Authorized Sale of Drugs in Peru<br><i>Hyperledger</i>                                         | Simulated |
| N357 | IEEE Xplore  | Bocek T. et al<br>2017        | Blockchains everywhere - a use-case of blockchains in the pharma supply-chain<br><i>Ethereum</i>                                                     | Nil       |
| N358 | ArXiv        | Mendonca RD. et al<br>2021    | BlockColdChain: Vaccine Cold Chain Blockchain<br><i>Ethereum</i>                                                                                     | Simulated |
| N359 | IEEE Xplore  | Subramanian G. et al<br>2021  | Crypto Pharmacy – Digital Medicine: A Mobile Application Integrated With Hybrid Blockchain to Tackle the Issues in Pharma Supply Chain<br><i>NEM</i> | Simulated |
| N360 | Pubmed       | Tseng JH. et al<br>2018       | Governance on the Drug Supply Chain via Gcoin Blockchain<br><i>Gcoin</i>                                                                             | Nil       |
| N361 | Pubmed       | Singh R. et al<br>2020        | Internet of Things Based Blockchain for Temperature Monitoring and Counterfeit Pharmaceutical Prevention<br><i>RAFT</i>                              | Simulated |
| N362 | IEEE Xplore  | Thatcher C. et al<br>2018     | Pharmaceutical uses of Blockchain Technology<br><i>Ethereum</i>                                                                                      | Nil       |
| N363 | IEEE Xplore  | Saxena N. et al<br>2020       | PharmaCrypt: Blockchain for Critical Pharmaceutical Industry to Counterfeit Drugs<br><i>Ethereum</i>                                                 | Simulated |
| N364 | Pubmed       | Steinwandter V. et al<br>2019 | Provable Data Integrity in the Pharmaceutical Industry Based on Version Control Systems and the Blockchain<br><i>Ethereum</i>                        | Simulated |
| N365 | IEEE Xplore  | Kumiawan H. et al<br>2020     | Utilization of the Blockchain Network in The Public Community Health Center Medicine Supply Chain<br><i>Hyperledger</i>                              | Simulated |
| N366 | IEEE Xplore  | Hu X. et al<br>2019           | vGuard: A Spatiotemporal Efficiency Supervision Method For Vaccine Production Based On Double-level Blockchain<br><i>Hyperledger</i>                 | Simulated |
| N367 | SpringerLink | Pandey P. et al<br>2020       | Securing E-health Networks from Counterfeit Medicine Penetration Using Blockchain<br><i>Hyperledger</i>                                              | Simulated |
|      |              | <i>Telemedicine</i>           |                                                                                                                                                      |           |

|      |                |                             |                                                                                                                                                 |           |
|------|----------------|-----------------------------|-------------------------------------------------------------------------------------------------------------------------------------------------|-----------|
| N368 | SpringerLink   | Lee T. et al<br>2020        | A blockchain-based Medical Data Preservation Scheme for Telecare Medical Information Systems<br><i>Not specified</i>                            | Simulated |
| N369 | SpringerLink   | Lin H. et al<br>2020        | A Secure Online Treatment Blockchain Service<br><i>Not specified</i>                                                                            | Simulated |
| N370 | IEEE Xplore    | Gupta R. et al<br>2020      | BITS: A Blockchain-driven Intelligent Scheme for Telesurgery System<br><i>Ethereum</i>                                                          | Simulated |
| N371 | ScienceDirect  | Wang W. et al\<br>2021      | Blockchain-assisted Handover Authentication for Intelligent Telehealth in Multi-Server Edge Computing Environment<br><i>Not specified</i>       | Simulated |
| N372 | Pubmed         | Celesti A. et al<br>2020    | Blockchain-Based Healthcare Workflow for Tele-Medical Laboratory in Federated Hospital IoT Clouds<br><i>Ethereum</i>                            | Simulated |
| N373 | SpringerLink   | Ji Y. et al<br>2018         | BMPLS: Blockchain-Based Multi-level Privacy-Preserving Location Sharing Scheme for Telecare Medical Information Systems<br><i>Not specified</i> | Simulated |
| N374 | IEEE Xplore    | Guo R. et al<br>2019        | Flexible and Efficient Blockchain-Based ABE Scheme With Multi-Authority for Medical on Demand in Telemedicine System<br><i>Not specified</i>    | Simulated |
| N375 | IEEE Xplore    | Gupta R. et al<br>2019      | HaBiTs: Blockchain-based Telesurgery Framework for Healthcare 4.0<br><i>Hyperledger</i>                                                         | Nil       |
| N376 | IEEE Xplore    | Kordestani H. et al<br>2020 | HapiChain: A Blockchain-based Framework for Patient-Centric Telemedicine<br><i>Ethereum</i>                                                     | Nil       |
| N377 | IEEE Xplore    | Hewa T. et al<br>2020       | Multi-Access Edge Computing and Blockchain-based Secure Telehealth System Connected with 5G and IoT<br><i>Hyperledger</i>                       | Simulated |
| N378 | Google Scholar | Rensaa JH. et al<br>2020    | VerifyMed-A blockchain platform for transparent trust in virtualized healthcare: Proof-of-concept<br><i>Ethereum</i>                            | Simulated |

**Figure 3.** Our review demonstrated significant cross-application of blockchain technology between the two categories such as EMR management and supply chain encryption. Unique indications for large-scale disease outbreaks such as the COVID-19 pandemic included pandemic surveillance and reporting, contact tracing and movement management, as well as verifiable health/vaccine passports and certificates. In comparison, applications beyond the scope of COVID-19 had greater diversity, ranging from areas such as genomics to patient consent management.

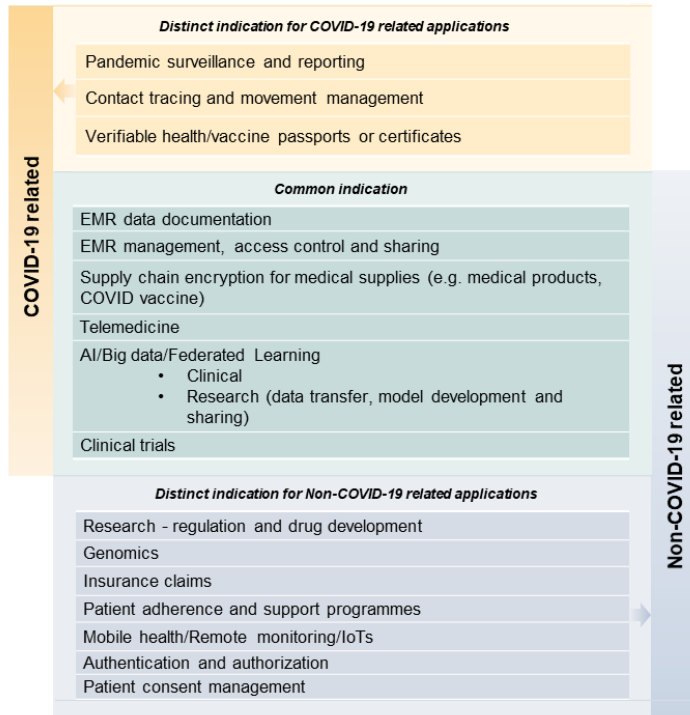

Supplement: mmc1.pdf [file mmc1.pdf]
